# Supplementary material for: Secondary attack rate of COVID-19 among contacts and risk factors, Tamil Nadu, March–May 2020: a retrospective cohort study
Source: PubMed Central journal article supplement — BMJ Open. 2021 Nov 5;11(11):e051491. doi: 10.1136/bmjopen-2021-051491 (PMC8573290; doi:10.1136/bmjopen-2021-051491), 2021-11-05
Supplement: bmjopen-2021-051491.draft_revisions.pdf [file bmjopen-2021-051491.draft_revisions.pdf]

# BMJ Open

BMJ Open is committed to open peer review. As part of this commitment we make the peer review history of every article we publish publicly available.

When an article is published we post the peer reviewers' comments and the authors' responses online. We also post the versions of the paper that were used during peer review. These are the versions that the peer review comments apply to.

The versions of the paper that follow are the versions that were submitted during the peer review process. They are not the versions of record or the final published versions. They should not be cited or distributed as the published version of this manuscript.

BMJ Open is an open access journal and the full, final, typeset and author-corrected version of record of the manuscript is available on our site with no access controls, subscription charges or pay-per-view fees (<http://bmjopen.bmj.com>).

If you have any questions on BMJ Open's open peer review process please email [info.bmjopen@bmj.com](mailto:info.bmjopen@bmj.com)

# BMJ Open

## Secondary attack rate of COVID-19 among contacts and risk factors, Tamil Nadu, April-May 2020: A retrospective Cohort Study

|                               |                                                                                                                                                                                                                                                                                                                                                                                                                                                                                                                                                                                                                                                                                                                                                                                                                                                                                                                                                                                                                                                                                                                                                                                                                                                                                                                                                                                                                                                                                                                                                                                                                                                                                                                                                                                                                                                                                                                                                                                                                                                                                                                                          |
|-------------------------------|------------------------------------------------------------------------------------------------------------------------------------------------------------------------------------------------------------------------------------------------------------------------------------------------------------------------------------------------------------------------------------------------------------------------------------------------------------------------------------------------------------------------------------------------------------------------------------------------------------------------------------------------------------------------------------------------------------------------------------------------------------------------------------------------------------------------------------------------------------------------------------------------------------------------------------------------------------------------------------------------------------------------------------------------------------------------------------------------------------------------------------------------------------------------------------------------------------------------------------------------------------------------------------------------------------------------------------------------------------------------------------------------------------------------------------------------------------------------------------------------------------------------------------------------------------------------------------------------------------------------------------------------------------------------------------------------------------------------------------------------------------------------------------------------------------------------------------------------------------------------------------------------------------------------------------------------------------------------------------------------------------------------------------------------------------------------------------------------------------------------------------------|
| Journal:                      | <i>BMJ Open</i>                                                                                                                                                                                                                                                                                                                                                                                                                                                                                                                                                                                                                                                                                                                                                                                                                                                                                                                                                                                                                                                                                                                                                                                                                                                                                                                                                                                                                                                                                                                                                                                                                                                                                                                                                                                                                                                                                                                                                                                                                                                                                                                          |
| Manuscript ID                 | bmjopen-2021-051491                                                                                                                                                                                                                                                                                                                                                                                                                                                                                                                                                                                                                                                                                                                                                                                                                                                                                                                                                                                                                                                                                                                                                                                                                                                                                                                                                                                                                                                                                                                                                                                                                                                                                                                                                                                                                                                                                                                                                                                                                                                                                                                      |
| Article Type:                 | Original research                                                                                                                                                                                                                                                                                                                                                                                                                                                                                                                                                                                                                                                                                                                                                                                                                                                                                                                                                                                                                                                                                                                                                                                                                                                                                                                                                                                                                                                                                                                                                                                                                                                                                                                                                                                                                                                                                                                                                                                                                                                                                                                        |
| Date Submitted by the Author: | 22-Mar-2021                                                                                                                                                                                                                                                                                                                                                                                                                                                                                                                                                                                                                                                                                                                                                                                                                                                                                                                                                                                                                                                                                                                                                                                                                                                                                                                                                                                                                                                                                                                                                                                                                                                                                                                                                                                                                                                                                                                                                                                                                                                                                                                              |
| Complete List of Authors:     | <p>Karumanagounder, Kolandaswamy; Directorate of Public Health and Preventive Medicine<br/> Raju, Mohankumar; National Institute of Epidemiology<br/> Ponnaiah, Manickam; National Institute of Epidemiology<br/> Kaur, P; National Institute of Epidemiology<br/> viswanathan, Vidhya; National Institute of Epidemiology<br/> Rubeshkumar, Polani; National Institute of Epidemiology<br/> Sakthivel, Manikandanesan; National Institute of Epidemiology<br/> Shanmugiah, Porchelvan; National Institute of Epidemiology<br/> Ganeshkumar, P; National Institute of Epidemiology<br/> Muthusamy, Santhosh Kumar ; National Institute of Epidemiology<br/> Sendhilkumar, Muthappan ; National Institute of Epidemiology,<br/> Epidemiology<br/> Venkatasamy, Vettrichelvan; National Institute of Epidemiology<br/> Sambath, Irene; National Institute of Epidemiology, Epidemiology<br/> Ilangovan, Kumaravel; National Institute of Epidemiology, Epidemiology<br/> M, Jagadeesan; Greater Chennai Corporation<br/> Govindarajan, Rameshkumar; Directorate of Public Health and Preventive Medicine<br/> Shanmugam, Soundammal; Directorate of Public Health and Preventive Medicine<br/> Rajarathinam, Selvakumar; Directorate of Public Health and Preventive Medicine<br/> Suresh, KST; Directorate of Public Health and Preventive Medicine<br/> Varadharajan, M; Directorate of Public Health and Preventive Medicine<br/> Thiagarajan, Manivannan; Directorate of Public Health and Preventive Medicine<br/> Jagadeeshkumar, K; Directorate of Public Health and Preventive Medicine<br/> Ganesh, Velmurugan; Directorate of Public Health and Preventive Medicine<br/> Kumar, Sateesh; Directorate of Public Health and Preventive Medicine<br/> Venkatesan, Prakash; Directorate of Public Health and Preventive Medicine<br/> Nallathambi, Yogananth; Directorate of Public Health and Preventive Medicine<br/> Palani, Sampath; Directorate of Public Health and Preventive Medicine<br/> Selvavinayagam, TS; Directorate of Public Health and Preventive Medicine<br/> Reddy, Madhusudhan; Greater Chennai Corporation</p> |

1  
2  
3  
4  
5  
6  
7  
8  
9  
10  
11  
12  
13  
14  
15  
16  
17  
18  
19  
20  
21  
22  
23  
24  
25  
26  
27  
28  
29  
30  
31  
32  
33  
34  
35  
36  
37  
38  
39  
40  
41  
42  
43  
44  
45  
46  
47  
48  
49  
50  
51  
52  
53  
54  
55  
56  
57  
58  
59  
60

|           |                                                                                                                                      |
|-----------|--------------------------------------------------------------------------------------------------------------------------------------|
|           | Rajesh, Beela; Government of Tamil Nadu, Health and Family Welfare Department<br>Murhekar, Manoj; National Institute of Epidemiology |
| Keywords: | COVID-19, Epidemiology < INFECTIOUS DISEASES, Infection control < INFECTIOUS DISEASES, Public health < INFECTIOUS DISEASES           |
|           |                                                                                                                                      |

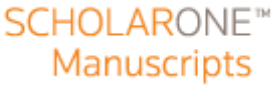

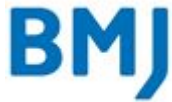

I, the Submitting Author has the right to grant and does grant on behalf of all authors of the Work (as defined in the below author licence), an exclusive licence and/or a non-exclusive licence for contributions from authors who are: i) UK Crown employees; ii) where BMJ has agreed a CC-BY licence shall apply, and/or iii) in accordance with the terms applicable for US Federal Government officers or employees acting as part of their official duties; on a worldwide, perpetual, irrevocable, royalty-free basis to BMJ Publishing Group Ltd ("BMJ") its licensees and where the relevant Journal is co-owned by BMJ to the co-owners of the Journal, to publish the Work in this journal and any other BMJ products and to exploit all rights, as set out in our [licence](#).

The Submitting Author accepts and understands that any supply made under these terms is made by BMJ to the Submitting Author unless you are acting as an employee on behalf of your employer or a postgraduate student of an affiliated institution which is paying any applicable article publishing charge ("APC") for Open Access articles. Where the Submitting Author wishes to make the Work available on an Open Access basis (and intends to pay the relevant APC), the terms of reuse of such Open Access shall be governed by a Creative Commons licence – details of these licences and which [Creative Commons](#) licence will apply to this Work are set out in our licence referred to above.

Other than as permitted in any relevant BMJ Author's Self Archiving Policies, I confirm this Work has not been accepted for publication elsewhere, is not being considered for publication elsewhere and does not duplicate material already published. I confirm all authors consent to publication of this Work and authorise the granting of this licence.

1  
2  
3 **Secondary attack rate of COVID-19 among contacts and risk factors, Tamil**  
4 **Nadu, April-May 2020: A retrospective Cohort Study**  
5  
6  
7  
8

9 Kolandaswamy Karumanagounder<sup>1</sup>, Raju Mohankumar<sup>2\*</sup>, Manickam Ponnaiah<sup>2</sup>,  
10 Prabhdeep Kaur<sup>2</sup>, Vidhya viswanathan<sup>2</sup>, Polani Rubeshkumar<sup>2</sup>, Manikandanesan  
11 Sakthivel<sup>2</sup>, Porchelvan Shanmugiah<sup>1,2</sup>, Parasuraman Ganeshkumar<sup>2</sup>, Muthusamy  
12 Santoshkumar<sup>2</sup>, Muthappan Sendhilkumar<sup>2</sup>, Vettrichelvan Venkatasamy<sup>2</sup>, Irene  
13 Sambath<sup>2</sup>, Kumaravel Ilangovan<sup>2</sup>, Jagadeesan M<sup>3</sup>, Rameshkumar Govindarajan<sup>1</sup>,  
14 Soundammal Shanmugam<sup>1</sup>, Selvakumar Rajarathinam<sup>1</sup>, Suresh KST<sup>1</sup>, Varadharajan  
15 M<sup>1</sup>, Manivannan Thiagarajan<sup>1</sup>, Jagadeeshkumar K<sup>1</sup>, Velmurugan Ganesh<sup>1</sup>, Sateesh  
16 Kumar<sup>1</sup>, Prakash Venkatesan<sup>1</sup>, Yogananth Nallathambi<sup>1</sup>, Sampath Palani<sup>1</sup>,  
17 Selvavinayagam TS<sup>1</sup>, Madhusudhan Reddy<sup>3</sup>, Beela Rajesh<sup>4</sup>, Manoj Murhekar<sup>2</sup>  
18  
19  
20  
21  
22  
23

24 <sup>1</sup>Directorate of Public Health and Preventive Medicine, Tamil Nadu

25 <sup>2</sup>ICMR National Institute of Epidemiology, Chennai

26 <sup>3</sup>Greater Chennai Corporation, Chennai

27 <sup>4</sup>Health and Family Welfare Department, Government of Tamil Nadu  
28  
29  
30  
31  
32

33 \*Corresponding author:

34  
35 Dr Raju Mohankumar, Consultant, ICMR-National Institute of Epidemiology, TNHB,  
36 Ayappakam, Chennai, India, PIN- 600077. Email: [mohankumar@nieicmr.org.in](mailto:mohankumar@nieicmr.org.in),

37  
38 Phone: +914426136333  
39  
40

41 **Word count:** 3527

42  
43 **Keywords:** Secondary Attack Rate, COVID-19, Contact investigation, Disease  
44 transmission, Cluster  
45  
46  
47  
48  
49  
50  
51  
52  
53  
54  
55  
56  
57  
58  
59  
60

**Abstract:**

Objective: To describe the characteristics of contacts of COVID-19 case-patients in terms of time, place, and person, to calculate the secondary attack rate and factors associated with COVID-19 infection among contacts

Design: Retrospective cohort study

Setting and participants: Contacts of cases identified by the health department from March 14 to May 5, 2020, in nine of 38 administrative districts of Tamil Nadu

Outcome measure: Attack rate among the contacts and factors associated with COVID-19 positivity.

**Results:**

We listed 15,702 contacts of 931 primary cases. Of the contacts, 89% (n=14002) were tested for COVID-19. The overall SAR was 4% (599/14002), with higher among the household contacts (13%) than the community contacts (1%). SAR among the contacts of primary cases with congregation exposure were five times higher than the contacts of non-congregation primary cases (10% Vs 2%). Being a household contact of a primary case with congregation exposure had a four-fold increased risk of getting COVID-19 (RR=16.4; 95%CI:13-20) than contact of primary case without congregation exposure. Among the symptomatic primary cases, household contacts of congregation primaries had higher RR than household contacts of other cases [(RR=25.3; 95%CI:10.2-63) Vs (RR=14.6; 95%CI:5.7-37.7)]. Among asymptomatic primary case, RR was increased among household contacts (RR=16.5; 95%CI:13.2–20.7) of congregation primaries compared to others

**Conclusion:**

Our study showed an increase in disease transmission among household contacts than community contacts. Also, symptomatic primary cases and primary cases with exposure to the congregation had more secondary cases than others.

**Strengths and Limitations:****• Strengths**

- We documented the secondary attack rate of COVID-19 in a large cohort of more than 15,000 contacts in India.

- Majority of the contacts were tested with RT-PCR, therefore the estimates of secondary attack rate were reliable.
- We documented high transmission among household contacts and contacts of symptomatic primary cases which guided the testing policy early in the pandemic in Tamil Nadu, India.

- **Limitations:**

- We did not have confirmation of the COVID-19 status of 11% of the contacts,
- Contact tracing was prioritised for household contacts during lockdown as the community interactions were limited.

## Background

The novel coronavirus outbreak due to Severe Acute Respiratory Syndrome Coronavirus 2 (SARS-CoV-2) infection reported from China in December 2019 was declared a Public Health Emergency of International Concern (PHEIC) by WHO on January 30, 2020<sup>1</sup>. At the early stages of COVID-19, international travel was the most common exposure. Subsequently, clusters emerged in various settings, including community gatherings, hospital settings, and commercial gatherings. Investigating such clusters provided clues for disease transmission and guided intervention strategies for pandemic response<sup>2</sup>. Contact tracing is one of the key strategies to interrupt the chain of transmission of SARS-CoV-2. The aim of the contact tracing strategy is to reduce secondary cases of COVID-19. In this context, the secondary attack rate of SARS-CoV-2 denotes the probability that infection occurs among susceptible contacts within a reasonable incubation period following contact with the infectious person(s) or that of the source<sup>3</sup> and represents infectiousness of the agent. The secondary attack rate among contacts thus is a useful indicator to track the viral transmission potential<sup>4</sup> and thereby guides control strategies. The secondary attack rate of SARS-CoV-2 differs from the nature of the setting and that of the symptomatic status of the primary cases.<sup>5 6 7 8</sup> Understanding the dynamics of transmission of COVID-19 for specific settings will help in preventing the spread of the infection<sup>9</sup>.

India reported the first laboratory-confirmed case on January 30, 2020, from a Southern state Kerala. In early March, most reported cases had a history of international travel or contact with the traveller<sup>10</sup>. Tamil Nadu, the southern State of India, reported the first case of COVID-19 on March 18 2020<sup>11</sup>. At the initial stages, COVID-19 cases were reported among international travellers and subsequently among travellers from other states. On March 13, the media reported a cluster of cases linked to a religious congregation in New Delhi.<sup>12 13</sup> According to the reports, the event started on February 9, 2020, with more than 4000 participants from various Indian states and abroad gathered in groups to attend the meeting.<sup>14</sup> As the participants returned to their respective states, clusters emerged in several states.<sup>15</sup> People from Tamil Nadu also participated in the meeting, predominantly during 21-23 March, 2020<sup>16</sup>. After returning from the event, attendees travelled to many parts



1  
2  
3 of the State. Public health authorities initiated a massive search for potential cases  
4 and their contact in various districts.  
5  
6

7 Due to the novelty of the pandemic, the transmission dynamics of the diseases were  
8 not fully understood. In the early phase, knowledge on the spread of the disease in  
9 various settings and in different geographical was not known. Knowing this  
10 information was crucial in preventing the disease's spread from the primary case to  
11 the contacts. In this context, we conducted a study to estimate the secondary attack  
12 rate in terms of time, place, and person and determined risk factors for COVID-19  
13 infection among contacts during March-May 2020 in Tamil Nadu, India.  
14  
15  
16  
17  
18

## 19 **Methods:**

### 20 **Study design**

21  
22 We conducted a retrospective cohort study of all contacts of COVID-19 cases  
23 between March 14 to May 5, 2020, of Tamil Nadu, Southern India.  
24  
25  
26  
27

### 28 **Study setting and the COVID-19 context:**

29  
30 We studied nine of 38 administrative districts reporting maximum cases during the  
31 study period (Figure 1). The study districts varied in a population density ranging  
32 from 28,553 persons per square Kilometre in the State capital city of Chennai to 367  
33 in Erode district, located southwest of Chennai (Table 1). The average family size  
34 was similar (3.5 to 4.3 persons per family) across these study districts.  
35  
36  
37  
38

39 The COVID-19 response strategies implemented by the State included surveillance  
40 for case identification, confirmation with Reverse Transcriptase-Polymerase Chain  
41 Reaction (RT-PCR) test for COVID-19, contact tracing, isolation, and quarantine, in  
42 addition to community-based interventions. The district officials hospitalised the  
43 COVID-19 patients, and quarantined COVID-19 tested negatives at home or facility.  
44 By contact tracing, the officials identified the household and the community contacts  
45 and tested them for COVID-19. We included all COVID-19 confirmed cases in the  
46 study period from these districts.  
47  
48  
49  
50  
51  
52  
53

### 54 **Sampling and sample size**

55  
56 We listed all the identified confirmed COVID-19 cases in the study districts from  
57 March 1 to May 30, 2020. We included all the contacts of the identified COVID-19  
58 positive individuals.  
59  
60

**Operational definitions:**

Primary case: We defined a primary case as any person with a laboratory-confirmed COVID-19 case with no established contact history.

Confirmed Case: Any person who is positive for COVID-19 using RT-PCR

Contact: Contact is any person exposed to COVID-19 positive individuals<sup>17</sup>.

Household contact: It is defined as any person living in the same household and comes in contact with the COVID-19 case

Community contact: It is defined as any person other than living in the same household and comes in contact with the COVID-19 case

Cluster: An unusual aggregation of health events grouped in time and space and reported to a health agency<sup>18</sup>

Secondary attack rate: The secondary attack rate is the proportion of COVID-19 positive individuals among the tested contacts minus the primary cases of the contacts.

**Data collection and analysis:**

We collected data from district surveillance records and classified the contacts as household and community contacts. We abstracted the information on sociodemographic characteristics, residence location, symptom status and congregation exposure of the primary case from the district surveillance records.

We described the total number of contacts and the median number of contacts per case by the district. We calculated the overall secondary attack rate (SAR) for COVID-19 and by age, gender, symptom status and congregation exposure of the primary case. We estimated the SAR by symptom status and congregation exposure of the primary case in two subgroups, namely household and community contacts. We determined the risk factors associated with COVID-19 infection among contacts based on the household vs community exposure, congregation vs non-congregation exposure of primary case and symptom status of the primary case. We estimated the unadjusted and age/sex-adjusted relative risk (RR) and 95% confidence intervals

(CI) for the four categories of contacts. The community contacts of the non-congregation primary case were the reference category. The other categories were community contacts of congregation primary, household contacts of non-congregation and household contacts of congregation primary cases. We also estimated the unadjusted and age/sex-adjusted RR and 95% CI after stratifying the four categories by symptom status of the primary case.

### **Human participation protection:**

We obtained the approval of the Institutional Ethics Committee of the ICMR-National Institute of Epidemiology. No primary information was collected from the participants. We maintained complete confidentiality and anonymity of the participants during data abstraction.

### **Results:**

#### ***Description of the cases and contacts***

We identified 931 COVID-19 primary cases and 15,702 contacts during the study period. The median number of contacts identified per COVID-19 case was 17 (IQR: 9, 18) in the selected nine districts. The duration, from the reporting of the first COVID-19 case to the time of data abstraction, ranged from 51 days for Chennai and 15 days in the Karur district. (Table 1).

Of the identified 15,702 contacts, 14,002 (89%) contacts were tested for COVID-19. Apart from household contacts, most community contacts (98%) were cab-drivers, vegetable sellers, co-workers, or co-passengers in public transport. The majority of the household contacts (99%) were tested. There is no difference between tested and not-tested by age and gender (data not shown).

Information on age was available for 99.7% (13,969/14,002) of the contacts (Table 2). The contacts were predominantly aged 21-40 years (41%) and 41 to 59 years (27%). Over half of the contacts were males (53%). About one-fourth (28%) of the contacts were traced from primary cases with congregation exposure, and 25% of the contacts had household COVID-19 exposure. Healthcare providers contributed to less than 1% of the contacts identified for the primary cases.

#### ***Secondary attack rate by selected characteristics***

1  
2  
3 Among tested contacts (n=14002), 599 (4.3%) tested positive for COVID-19 based  
4 on RT PCR. The overall secondary attack rate was 4% (599 of 14,002). The  
5 secondary attack rate was similar across the age groups and gender, ranging from  
6 4% to 5%. The secondary attack rate among the contacts of primary cases with  
7 congregation exposure was five times higher (10%) than contacts of non-  
8 congregation primary cases (2%). Of the 598 contacts who tested positive, more  
9 than three-fourths (78%) were household contacts.

10 The overall secondary attack rate was 4%, with 13% among the household contacts  
11 compared to 1% among the community contacts. The secondary attack among  
12 household contacts of primary cases with exposure to congregation was higher  
13 (21%) than the contacts of primary cases without congregation exposure (6%) (Table  
14 3). The primary cases' symptomatic status was available for 95% (13,338) of the  
15 tested contacts. The overall secondary attack among contacts of the primary cases  
16 with COVID -19 symptoms was 6% compared to 4% among the contacts of  
17 asymptomatic cases. The household contacts exposed to the symptomatic primary  
18 case had two times higher attack rate as compared to contacts of asymptomatic  
19 primary cases (25% vs 12%). Secondary attack among the community contacts was  
20 similar irrespective of the symptomatic status of the primary case.

### 21 ***Risk factors for secondary cases***

22 We estimated the risk of acquiring infection for contacts by type of contact and  
23 congregation participation of the primary cases. There was no significant risk among  
24 the community contacts of the primary cases irrespective of the participation in the  
25 congregation. The relative risk of household contacts of primary cases with  
26 congregation participation was four times higher (RR=16.4; 95% CI: 13.3 to 20.2) in  
27 getting COVID-19 compared to household contacts of other primary cases (RR=4.9;  
28 95% CI: 3.81 to 6.38). The association did not change even after adjusting for age  
29 and gender. (Table 4)

30 We estimated the RR stratified by the symptomatic status of the primary cases. In  
31 the strata where the primary case was symptomatic, there was an eight-fold increase  
32 in RR for household contacts of congregation participants when compared to the  
33 household contacts of other cases [RR=25.3,95% CI: 10.2 to 63) vs RR= 14.6, 95%  
34 CI: 5.7 to 37.7)]. If the primary case was asymptomatic, there was no increase in RR  
35 for community contacts of congregation participants, but RR was increased among  
36

1  
2  
3 household contacts of primary cases with congregation exposure. The change in RR  
4 among household contacts of the symptomatic primary case was several folds  
5 higher as compared to household contacts of the asymptomatic primary case (Table  
6  
7  
8 5).  
9

## 10 **Discussion:**

11  
12  
13 Our study showed an increase in disease transmission among household contacts  
14 than community contacts. The transmission was further accentuated if the primary  
15 case had symptoms or exposure to a congregation. The high risk of infection among  
16 family members was consistent with the pooled analysis of 43 studies which  
17 estimated an SAR of 18% among household contacts<sup>19</sup>. We observed very low SAR  
18 (1%) among non-household contacts, possibly due to the State's lockdown situation  
19 during the study period.  
20  
21  
22  
23  
24

25 Contact tracing is one of the core public health strategies for COVID-19 control, and  
26 our study assessed if districts implemented this strategy. Although the median  
27 number of contacts per case was 17, there was a high variation between districts  
28 due to limiting the contact tracing to only household contacts in several cases. A  
29 study in the UK measuring the efficacy of contact tracing for COVID-19 suggested an  
30 average of 36 contacts must be traced per case<sup>20</sup>. Another study in the Republic of  
31 Korea shows a range of 15-649 contacts traced per case<sup>21</sup>. Once the number of  
32 cases increases, extensive contact tracing may not be feasible unless we deploy  
33 dedicated human resources and train the contact tracers. There was limited capacity  
34 in the initial phase of the epidemic; however, the public health department added  
35 human resources, especially in the capital city of Chennai, to sustain the contact  
36 tracing as cases started increasing.  
37  
38  
39  
40  
41  
42  
43  
44  
45

46 We observed a higher attack rate among household contacts (25%) of symptomatic  
47 primary cases when compared to asymptomatic. Our observations were similar to a  
48 pooled analysis of three studies from Wei et al.<sup>22</sup>, Part et al.<sup>23</sup>, Chaw et al.<sup>24</sup>, which  
49 reported 20% SAR among household contacts of symptomatic primary cases<sup>25</sup>. This  
50 observation guided the testing policy in the context of limited resources at the peak  
51 of the pandemic. We prioritised the testing of household contacts of symptomatic  
52 primary cases. Although the attack rate was lower among contacts of asymptomatic  
53 primary, the transmission did take place especially in the household setting. Our  
54  
55  
56  
57  
58  
59  
60

1  
2  
3 findings support the rationale of isolation of all cases irrespective of the symptoms  
4 and testing of all household contacts to break the chain of transmission<sup>26</sup>.

5  
6  
7 The congregation clusters were one of the sources which led to COVID-19  
8 transmission in various communities<sup>27</sup>. Similar to our setting, many countries  
9 experienced clusters emerging from congregation settings. In South Korea, an  
10 explosive outbreak happened following a social event held at a Church and is  
11 attributable to 84% of the total confirmed cases of South Korea reported till mid-  
12 March<sup>28</sup>. Another study in Jordan among the wedding attendees reported a higher  
13 attack rate of 22%<sup>29</sup>. Similar clusters had been reported in different parts of South  
14 Korea<sup>30</sup>, and in the USA, a secondary attack of 53.3% was estimated among one  
15 such event attendees<sup>31</sup>. Avoiding any type of gathering is one of the essential  
16 mitigation measures to be followed strictly. Government actions to ban mass  
17 gatherings are essential, as are good diagnostic facilities and remotely accesses  
18 health advice, together with specialised treatment for people with severe disease<sup>32</sup>.

19  
20  
21 Our study has several limitations. We did not have confirmation of the COVID-19  
22 status of 11% of the contacts, who were mostly community contacts. Hence, this  
23 may have over-estimated the overall secondary attack rate by 0.3%. Contact tracing  
24 was prioritised for household contacts due to restricted mobility and limited  
25 interactions at the community level. Therefore, secondary attack among non-  
26 household contacts may not reflect the real transmission potential. Information  
27 regarding symptoms was retrieved from district surveillance records. The symptom  
28 status was collected at the time of diagnosis. We could not verify if the primary case  
29 developed symptoms later in the course of illness. Hence, there was a chance of  
30 misclassification of symptom status.

31  
32  
33 We conclude that COVID-19 transmission was higher among household contacts,  
34 contacts of symptomatic primary case, and contacts of primary cases exposed to the  
35 congregation. Based on the findings, we informed the testing policy and contact  
36 tracing strategy in the early stages of the COVID-19 epidemic in Tamil Nadu. We  
37 recommend testing all household contacts irrespective of the symptoms and  
38 extensive contact tracing and testing in case of super spreader events. In resource-  
39 constrained settings, all contacts of symptomatic primary cases should be prioritised  
40 for testing. The gatherings should be restricted to prevent significant clusters.

1  
2  
3 **Author Contributions:** KK, RM, MP, and PK designed the study, supervised  
4 fieldwork, did primary data collection, planned data analysis and wrote the first draft  
5 of the manuscript. VV, PR, MS, PS, PG and MS did primary data collection and did  
6 data analysis. VV, IS, and KI supervised fieldwork and data management. JM, RG,  
7 SS, SR, SKST, VM, MT, JK, VG, and SK supervised fieldwork and supported data  
8 collection. PV, YN, SP, STS, MR, BR and MM conceptualised the study and gave  
9 critical comments in finalising the manuscript. All authors approved the final  
10 manuscript  
11  
12  
13  
14  
15  
16  
17  
18  
19

20 **Funding:**

21 This work was supported by ICMR-National Institute of Chennai intramural funds.

22 Award/Grant number: Not applicable

23 **Competing interests:** None declared

24 **Patient consent for publication:** Not required

25 **Ethics approval:** Institutional Ethics Committee of ICMR-National Institute of  
26 Epidemiology, Chennai, approved the study. Written consent was not required for  
27 this study

28 **Provenance and peer review:** Not commissioned; externally peer-reviewed.

29 **Data availability statement:** Data are available upon reasonable request

30 **Patient and Public Involvement in research:** Not involved in the conduct of  
31 research

32 **Trial registration:** Not applicable

33 **Figure 1:** Map of Tamil Nadu included in the epidemiological study of COVID-19.  
34 There are nine of the 38 districts included in the study.  
35  
36  
37  
38  
39  
40  
41  
42  
43  
44  
45  
46  
47  
48  
49  
50  
51  
52  
53  
54  
55  
56  
57  
58  
59  
60

**Table 1: Frequency of contacts traced per COVID-19 primary case by district, Tamil Nadu, India, April-May, 2020**

| District       | Demographic characteristics     |              | # Primary Cases | Frequency of contacts |                                          | Days since reporting of the first case in the district |
|----------------|---------------------------------|--------------|-----------------|-----------------------|------------------------------------------|--------------------------------------------------------|
|                | Population density (Per Sq KM)* | Family size* |                 | # Contacts identified | Median (Range) contacts per Primary case |                                                        |
| Chennai        | 26553                           | 3.9          | 530             | 9731                  | 18 (1 to 151)                            | 51                                                     |
| Coimbatore     | 731                             | 3.9          | 151             | 3257                  | 22 (1 to 274)                            | 33                                                     |
| Erode          | 391                             | 3.5          | 56              | 1032                  | 18 (3 to 141)                            | 46                                                     |
| Karur          | 367                             | 3.7          | 42              | 416                   | 10 (1 to 86)                             | 15                                                     |
| Ranipet        | 648                             | 4.3          | 29              | 273                   | 9 (1 to 68)                              | 25                                                     |
| Tirunelveli    | 460                             | 3.8          | 35              | 166                   | 5 (1 to 21)                              | 23                                                     |
| Tirupathur     | 648                             | 4.3          | 12              | 312                   | 26 (1 to 100)                            | 20                                                     |
| Tiruppur       | 478                             | 3.6          | 66              | 279                   | 5 (1 to 10)                              | 24                                                     |
| Vellore        | 648                             | 4.3          | 10              | 236                   | 24 (6 to 79)                             | 23                                                     |
| <b>Overall</b> |                                 |              | <b>931</b>      | <b>15,702</b>         | <b>17(5 to 26)</b>                       |                                                        |

\*- Census 2011



**Table 2: Secondary Attack Rate (%) by selected characteristics among the contacts traced per COVID-19 primary case, Tamil Nadu, India, April- May 2020**

| Selected characteristics                         |                      | Number of contacts (%) | # COVID-19 Positive | Secondary attack rate (%) |
|--------------------------------------------------|----------------------|------------------------|---------------------|---------------------------|
| Overall                                          |                      | 14002(100%)            | 599                 | 4                         |
| Age in Years (N=13,379)                          | ≤20                  | 3203 (24%)             | 138                 | 4                         |
|                                                  | 21-40                | 5511 (41%)             | 237                 | 4                         |
|                                                  | 41-59                | 3364 (25%)             | 155                 | 5                         |
|                                                  | 60+                  | 1301 (10%)             | 65                  | 5                         |
| Gender (N=13,969)                                | Male                 | 7443 (53%)             | 280                 | 4                         |
|                                                  | Female               | 6526 (47%)             | 318                 | 5                         |
| Congregation exposure of primary case (N=14,002) | Yes                  | 3884 (28%)             | 377                 | 10                        |
|                                                  | No                   | 10,118 (72%)           | 222                 | 2                         |
| Contact type (N=14,002)                          | Household            | 3474 (25%)             | 464                 | 13                        |
|                                                  | Community            | 10,417 (74%)           | 134                 | 1                         |
|                                                  | Healthcare personnel | 111 (1%)               | 0                   | 0                         |
| Symptom status of Primary case (N=13338)         | Symptomatic          | 607(5%)                | 37                  | 6                         |
|                                                  | Asymptomatic         | 12,731(95%)            | 464                 | 4                         |

**Table 3: Secondary Attack Rate among household and non-household contacts of COVID-19 individuals by type of exposure and symptom status of primary cases, Tamil Nadu, April-May, 2020 (N=14002)**

| Type of exposure or symptom status of the primary case | The secondary attack rate (%)<br>(# cases / # contacts of the case) |                      |                       |
|--------------------------------------------------------|---------------------------------------------------------------------|----------------------|-----------------------|
|                                                        | Household                                                           | Community contacts   | Overall               |
| <b><u>N = 14,002</u></b>                               |                                                                     |                      |                       |
| Congregation                                           | <b>21%</b> (352/1686)                                               | <b>1%</b> (25/2198)  | <b>10%</b> (377/3884) |
| No congregation                                        | <b>6%</b> (112/1788)                                                | <b>1%</b> (110/8330) | <b>2%</b> (222/10118) |
| <b><u>N= 13,338</u></b>                                |                                                                     |                      |                       |
| Symptomatic                                            | <b>25%</b> (26/104)                                                 | <b>2%</b> (11/503)   | <b>6%</b> (37/607)    |
| Asymptomatic                                           | <b>12%</b> (341/2930)                                               | <b>1%</b> (123/9801) | <b>4%</b> (464/12731) |

**Table 4: Factors associated with COVID-19 among the contacts of Tamil Nadu, India April – May 2020**

| <b>Risk factors</b>                                  | <b>Crude RR (95% CI)</b> | <b>RR with age-adjusted (95% CI)</b> | <b>RR with age and sex-adjusted (95% CI)</b> |
|------------------------------------------------------|--------------------------|--------------------------------------|----------------------------------------------|
| Community contacts of non-congregation Primary cases | Ref                      | Ref                                  | Ref                                          |
| Community contact of Congregation Primary cases      | 1.0 (0.7-1.5)            | 0.9 (0.6-1.4)                        | 0.9 (0.6-1.4)                                |
| Household contacts of non-congregation Primary cases | 4.9 (3.8-6.4)            | 4.7 (3.7 – 6.2)                      | 4.7 (36.4-6.1)                               |
| Household contacts of Congregation Primary cases     | 16.4 (13.3–20.2)         | 16.2 (13.1-20.0)                     | 16.1 (13.0-20.0)                             |

For peer review only

1  
2  
3  
4  
5  
6  
7  
8  
9  
10  
11  
12  
13  
14  
15  
16  
17  
18  
19  
20  
21  
22  
23  
24  
25  
26  
27  
28  
29  
30  
31  
32  
33  
34  
35  
36  
37  
38  
39  
40  
41  
42  
43  
44  
45  
46

**Table 5: Factors associated with COVID-19 among the contacts stratified by the symptomatic status of the primary cases of Tamil Nadu, India April – May 2020**

| <b>Symptomatic Primary</b> | <b>Type of contacts</b>                              | <b>Crude RR (95% CI)</b> | <b>Adjusted RR with Age and Sex (95% CI)</b> |
|----------------------------|------------------------------------------------------|--------------------------|----------------------------------------------|
| Yes                        | Community contacts of non-congregation Primary cases | Ref                      | Ref                                          |
|                            | Community contact of Congregation Primary cases      | 10.5 (6.0-33.0)          | 8.6 (2.6 – 29.1)                             |
|                            | Household contacts of non-congregation Primary cases | 15.5 (6.0-39.8)          | 14.6 (5.7 – 37.7)                            |
|                            | Household contacts of Congregation Primary cases     | 26.7 (10.8-65.9)         | 25.3 (10.2 – 63.0)                           |
| No                         | Community contacts of non-congregation Primary cases | Ref                      | Ref                                          |
|                            | Community contact of Congregation Primary cases      | 0.9 (0.6-1.4)            | 0.9 (0.5 – 1.3)                              |
|                            | Household contacts of non-congregation Primary cases | 4.6 (3.5-6.0)            | 4.4 (3.4 – 5.8)                              |
|                            | Household contacts of Congregation Primary cases     | 16.48 (13.17-20.63)      | 16.52 (13.16 – 20.74)                        |

## Reference:

1, World Health Organization. Statement on the second meeting of the International Health Regulations (2005) Emergency Committee regarding the outbreak of novel coronavirus (2019-nCoV). [https://www.who.int/news-room/detail/30-01-2020-statement-on-the-second-meeting-of-the-international-health-regulations-\(2005\)-emergency-committee-regarding-the-outbreak-of-novel-coronavirus-\(2019-ncov\)](https://www.who.int/news-room/detail/30-01-2020-statement-on-the-second-meeting-of-the-international-health-regulations-(2005)-emergency-committee-regarding-the-outbreak-of-novel-coronavirus-(2019-ncov)) (2020).

<sup>2</sup> WHO; Coronavirus disease (COVID-19): Contact tracing 2020 [Available from: <https://www.who.int/news-room/q-a-detail/coronavirus-disease-covid-19-contact-tracing>.

<sup>3</sup> Halloran ME. Secondary Attack Rate. In: Peter A, Theodore C, editors. Encyclopedia of Biostatistics. New York: John Wiley & Sons Ltd; 2005

<sup>4</sup> Li W, Zhang B, Lu J, Liu S, Chang Z, Cao P, et al. The characteristics of household transmission of COVID-19. *Clinical Infectious Diseases*. 2020.

<sup>5</sup> Liu Y, Eggo RM, Kucharski AJ. Secondary attack rate and superspreading events for SARS-CoV-2. *The Lancet*. 2020 Mar 14;395(10227):e47

<sup>6</sup> Luo L, Liu D, Liao X, Wu X, Jing Q, Zheng J, Liu F, Yang S, Bi H, Li Z, Liu J. Contact settings and risk for transmission in 3410 close contacts of patients with COVID-19 in Guangzhou, China: a prospective cohort study. *Annals of internal medicine*. 2020 Aug 13

<sup>7</sup> Yang J, Zheng Y, Gou X, Pu K, Chen Z, Guo Q, et al. Prevalence of comorbidities and its effects in patients infected with SARS-CoV-2: a systematic review and meta-analysis. *International Journal of Infectious Diseases*. 2020; 94:91-5

<sup>8</sup> Cheng HY, Jian SW, Liu DP, Ng TC, Huang WT, Lin HH. High transmissibility of COVID-19 near symptom onset. *medRxiv*. 2020 Jan 1

<sup>9</sup> Wilder-Smith A, Chiew CJ, Lee VJ. Can we contain the COVID-19 outbreak with the same measures as for SARS?. *The Lancet Infectious Diseases*. 2020 Mar 5

<sup>10</sup> Jahan N, Rubeshkumar P, Karuppiyah M, Sambath I, Sendhilkumar M, Ilangovan K, et al. Entry and initial spread of COVID-19 in India: Epidemiological analysis of media surveillance data, India, 2020. *Clinical Epidemiology and Global Health*. 2020.

<sup>11</sup> MediaBulletin180320COVID19.pdf [Internet]. [cited 2020 May 31]. Available from: <https://stopcorona.tn.gov.in/wp-content/uploads/files/MediaBulletin180320COVID19.pdf>

<sup>12</sup> Ali, A. (2020, April 1). Coronavirus was a test of secular nationalism. Then Tablighi Jamaat became the scapegoat. *The Print*. <https://theprint.in/opinion/coronavirus-test-of-secular-nationalism-tablighi-jamaat-became-scapegoat/392764/>

<sup>13</sup> Gathering at Nizamuddin a highly irresponsible act, says Kejriwal. (2020, March 31). *The Hindu*. <https://www.thehindu.com/news/cities/Delhi/gathering-at-nizamuddin-a-highly-irresponsible-act-says-kejriwal/article31221982.ece>

<sup>14</sup> Chandna, H. (2020, April 18). 30% of India's Covid-19 positive caseload linked to Tablighi Jamaat meet, says govt. *The Print*. <https://theprint.in/health/30-of-indias-covid-19-positive-caseload-linked-to-tablighi-jamaat-meet-says-govt/404426/>

- 1  
2  
3  
4  
5  
6  
7  
8  
9  
10  
11  
12  
13  
14  
15  
16  
17  
18  
19  
20  
21  
22  
23  
24  
25  
26  
27  
28  
29  
30  
31  
32  
33  
34  
35  
36  
37  
38  
39  
40  
41  
42  
43  
44  
45  
46  
47  
48  
49  
50  
51  
52  
53  
54  
55  
56  
57  
58  
59  
60
- 
- <sup>15</sup> Of 14,378 total Covid-19 cases in India, 4,291 linked to Delhi's Markaz event: Health ministry. (2020, April 18). *India Today*. <https://www.indiatoday.in/india/story/coronavirus-india-total-cases-linked-tablighi-jamaat-markaz-nizamuddin-event-health-ministry-1668456-2020-04-18>
- <sup>16</sup> NDTV. 1,023 COVID-19 Cases Linked To Mosque Event, Tamil Nadu Leads: 10 Points: NDTV; [Available from: <https://www.ndtv.com/india-news/coronavirus-tablighi-jamaat-1-023-of-2-902-covid-19-cases-linked-to-mosque-event-tamil-nadu-leads-2206193>
- <sup>17</sup> National Centre for Disease Control Directorate General of Health Services MoH&FW, GOI, New Delhi The updated case definitions and contact-categorisation [internet]. [cited 2020 Jun 2]. Available from [https://nirth.res.in/virology/Revised\\_case\\_definitions\\_for\\_COVID\\_19.pdf](https://nirth.res.in/virology/Revised_case_definitions_for_COVID_19.pdf)
- <sup>18</sup> US Department of Health and Human Services. Guidelines for investigating clusters of health events. *Mort Morb Wkly Rep*. 1990;39:1-23.
- <sup>19</sup> Koh WC, Naing L, Chaw L, Rosledzana MA, Alikhan MF, et al. (2020) What do we know about SARS-CoV-2 transmission? A systematic review and meta-analysis of the secondary attack rate and associated risk factors. *PLOS ONE* 15(10): e0240205. <https://doi.org/10.1371/journal.pone.0240205>
- <sup>20</sup> Keeling MJ, Hollingsworth TD, Read JM. The Efficacy of Contact Tracing for the Containment of the 2019 Novel Coronavirus (COVID-19). *medRxiv*. 2020.
- <sup>21</sup> COVID-19 National Emergency Response Center Epidemiology and case management team, Korea Centers for disease Control and prevention. Coronavirus disease-19: summary of 2,370 contact investigations of the first 30 cases in the Republic of Korea. *Public Health Res Perspect*. 2020;11(2):81–84. doi: 10.24171/j.phrp.2020.11.2.04
- <sup>22</sup> Wei L, Lv Q, Wen Y, Feng S, Gao W, Chen Z, Cao B, Wu X, Lu Y, Zhao J, Zou X. Household transmission of COVID-19, Shenzhen, January-February 2020. *medRxiv*. 2020 Jan 1
- <sup>23</sup> Park SY, Kim YM, Yi S, Lee S, Na BJ, Kim CB, Kim JI, Kim HS, Kim YB, Park Y, Huh IS. Coronavirus disease outbreak in call center, South Korea. *Emerging infectious diseases*. 2020 Aug;26(8):1666.
- <sup>24</sup> Chaw, L., Koh, W., Jamaludin, S., Naing, L., Alikhan, M., & Wong, J. (2020). Analysis of SARS-CoV-2 Transmission in Different Settings, Brunei. *Emerging Infectious Diseases*, 26(11), 2598-2606. <https://dx.doi.org/10.3201/eid2611.202263>
- <sup>25</sup> Koh WC, Naing L, Chaw L, Rosledzana MA, Alikhan MF, et al. (2020) What do we know about SARS-CoV-2 transmission? A systematic review and meta-analysis of the secondary attack rate and associated risk factors. *PLOS ONE* 15(10): e0240205. <https://doi.org/10.1371/journal.pone.0240205>
- <sup>26</sup> MOHFW. Revised guidelines for Home Isolation of very mild/pre-symptomatic/asymptomatic COVID-19 cases. MOHFW 2020 July 2 [Available from [RevisedHomeIsolationGuidelines.pdf \(mohfw.gov.in\)](https://www.mohfw.gov.in/RevisedHomeIsolationGuidelines.pdf)]
- <sup>27</sup> Quadri SA. COVID-19 and religious congregations: Implications for spread of novel pathogens. *International Journal of Infectious Diseases*. 2020 Jul 1;96:219-21.

1  
2  
3  
4  
5  
6  
7  
8  
9  
10  
11  
12  
13  
14  
15  
16  
17  
18  
19  
20  
21  
22  
23  
24  
25  
26  
27  
28  
29  
30  
31  
32  
33  
34  
35  
36  
37  
38  
39  
40  
41  
42  
43  
44  
45  
46  
47  
48  
49  
50  
51  
52  
53  
54  
55  
56  
57  
58  
59  
60

---

<sup>28</sup> Choi JY. COVID-19 in South Korea. *Postgraduate Medical Journal*. 2020;96(1137):399-402.

<sup>29</sup> Yusef D, Hayajneh W, Awad S, Momany S, Khassawneh B, Samrah S, Obeidat B, Raffee L, Al-Faouri I, Issa AB, Al Zamel H. Large outbreak of coronavirus disease among wedding attendees, Jordan. *Emerging infectious diseases*. 2020 Sep;26(9):2165.

<sup>30</sup> Shim E, Tariq A, Choi W, Lee Y, Chowell G. Transmission potential and severity of COVID-19 in South Korea. *International Journal of Infectious Diseases*. 2020;93:339-44.

<sup>31</sup> Hamner L, Dubbel P, Capron I, Ross A, Jordan A, Lee J, et al. High SARS-CoV-2 Attack Rate Following Exposure at a Choir Practice - Skagit County, Washington, March 2020. *MMWR Morbidity and mortality weekly report*. 2020;69(19):606-10

<sup>32</sup> The Times of India; Avoid mass gatherings, says govt as corona cases hit 31: [Available from: [http://timesofindia.indiatimes.com/articleshow/74520610.cms?utm\\_source=contentofinterest&utm\\_medium=text&utm\\_campaign=cppst](http://timesofindia.indiatimes.com/articleshow/74520610.cms?utm_source=contentofinterest&utm_medium=text&utm_campaign=cppst)]

peer review only

Figure 1: Study district included in the epidemiology study of COVID-19,  
Tamil Nadu, India, April 2020

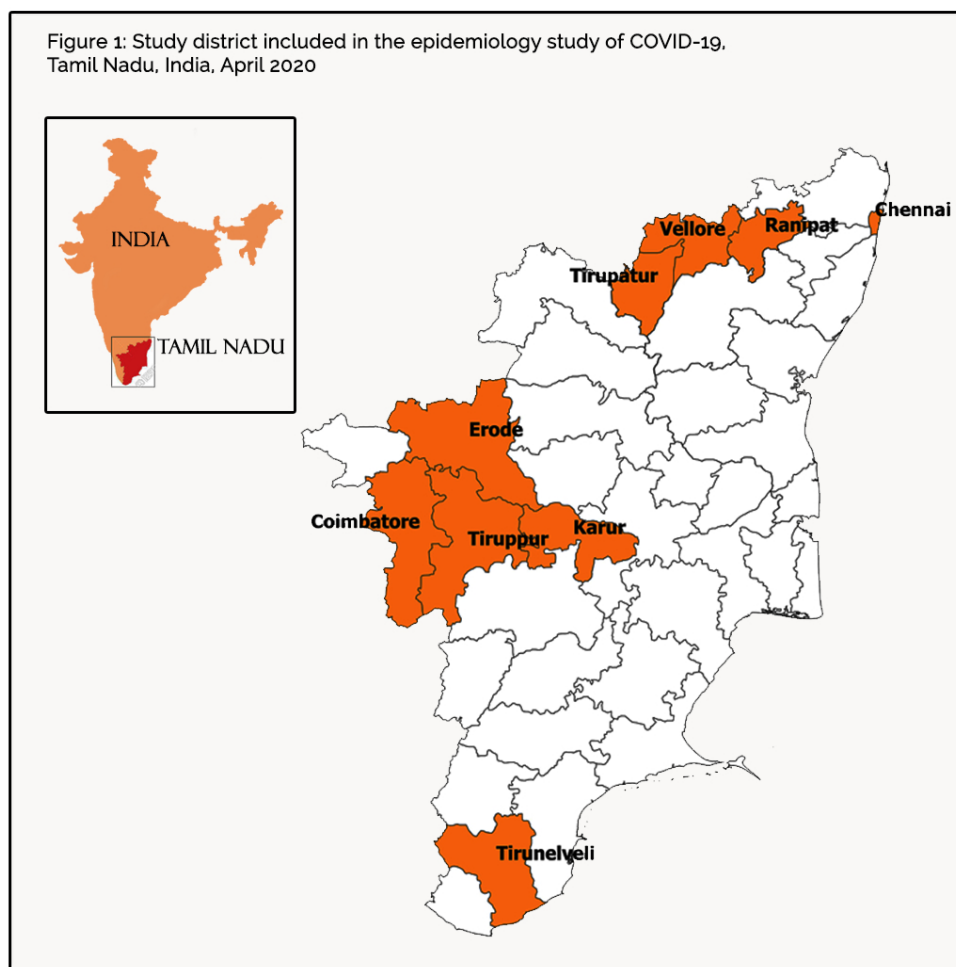

Map of Tamil Nadu included in the epidemiological study of COVID-19. There are nine of the 38 districts included in the study.

90x90mm (300 x 300 DPI)



# Reporting checklist for cohort study.

Based on the STROBE cohort guidelines.

## Instructions to authors

Complete this checklist by entering the page numbers from your manuscript where readers will find each of the items listed below.

Your article may not currently address all the items on the checklist. Please modify your text to include the missing information. If you are certain that an item does not apply, please write "n/a" and provide a short explanation.

Upload your completed checklist as an extra file when you submit to a journal.

In your methods section, say that you used the STROBE cohort reporting guidelines, and cite them as:

von Elm E, Altman DG, Egger M, Pocock SJ, Gøtzsche PC, Vandenbroucke JP. The Strengthening the Reporting of Observational Studies in Epidemiology (STROBE) Statement: guidelines for reporting observational studies.

|                           |                                                                                                        | Page   |
|---------------------------|--------------------------------------------------------------------------------------------------------|--------|
|                           | Reporting Item                                                                                         | Number |
| <b>Title and abstract</b> |                                                                                                        |        |
| Title                     | <a href="#">#1a</a> Indicate the study's design with a commonly used term in the title or the abstract | 1      |

|    |                      |                     |                                                               |     |
|----|----------------------|---------------------|---------------------------------------------------------------|-----|
| 1  | Abstract             | <a href="#">#1b</a> | Provide in the abstract an informative and balanced           | 2   |
| 2  |                      |                     | summary of what was done and what was found                   |     |
| 3  |                      |                     |                                                               |     |
| 4  |                      |                     |                                                               |     |
| 5  |                      |                     |                                                               |     |
| 6  | <b>Introduction</b>  |                     |                                                               |     |
| 7  |                      |                     |                                                               |     |
| 8  |                      |                     |                                                               |     |
| 9  |                      |                     |                                                               |     |
| 10 | Background /         | <a href="#">#2</a>  | Explain the scientific background and rationale for the       | 3   |
| 11 | rationale            |                     | investigation being reported                                  |     |
| 12 |                      |                     |                                                               |     |
| 13 |                      |                     |                                                               |     |
| 14 |                      |                     |                                                               |     |
| 15 | Objectives           | <a href="#">#3</a>  | State specific objectives, including any prespecified         | 4   |
| 16 |                      |                     | hypotheses                                                    |     |
| 17 |                      |                     |                                                               |     |
| 18 |                      |                     |                                                               |     |
| 19 |                      |                     |                                                               |     |
| 20 | <b>Methods</b>       |                     |                                                               |     |
| 21 |                      |                     |                                                               |     |
| 22 |                      |                     |                                                               |     |
| 23 | Study design         | <a href="#">#4</a>  | Present key elements of study design early in the paper       | 4   |
| 24 |                      |                     |                                                               |     |
| 25 |                      |                     |                                                               |     |
| 26 | Setting              | <a href="#">#5</a>  | Describe the setting, locations, and relevant dates,          | 4   |
| 27 |                      |                     | including periods of recruitment, exposure, follow-up, and    |     |
| 28 |                      |                     | data collection                                               |     |
| 29 |                      |                     |                                                               |     |
| 30 |                      |                     |                                                               |     |
| 31 |                      |                     |                                                               |     |
| 32 |                      |                     |                                                               |     |
| 33 |                      |                     |                                                               |     |
| 34 | Eligibility criteria | <a href="#">#6a</a> | Give the eligibility criteria, and the sources and methods of | 5   |
| 35 |                      |                     | selection of participants. Describe methods of follow-up.     |     |
| 36 |                      |                     |                                                               |     |
| 37 |                      |                     |                                                               |     |
| 38 |                      |                     |                                                               |     |
| 39 | Eligibility criteria | <a href="#">#6b</a> | For matched studies, give matching criteria and number of     | n/a |
| 40 |                      |                     | exposed and unexposed                                         |     |
| 41 |                      |                     |                                                               |     |
| 42 |                      |                     |                                                               |     |
| 43 |                      |                     |                                                               |     |
| 44 |                      |                     |                                                               |     |
| 45 | Variables            | <a href="#">#7</a>  | Clearly define all outcomes, exposures, predictors,           | 5   |
| 46 |                      |                     | potential confounders, and effect modifiers. Give             |     |
| 47 |                      |                     | diagnostic criteria, if applicable                            |     |
| 48 |                      |                     |                                                               |     |
| 49 |                      |                     |                                                               |     |
| 50 |                      |                     |                                                               |     |
| 51 |                      |                     |                                                               |     |
| 52 |                      |                     |                                                               |     |
| 53 | Data sources /       | <a href="#">#8</a>  | For each variable of interest give sources of data and        | 5   |
| 54 | measurement          |                     | details of methods of assessment (measurement).               |     |
| 55 |                      |                     | Describe comparability of assessment methods if there is      |     |
| 56 |                      |                     |                                                               |     |
| 57 |                      |                     |                                                               |     |
| 58 |                      |                     |                                                               |     |
| 59 |                      |                     |                                                               |     |
| 60 |                      |                     |                                                               |     |

more than one group. Give information separately for for  
exposed and unexposed groups if applicable.

|    |                |                      |                                                                |
|----|----------------|----------------------|----------------------------------------------------------------|
| 1  |                |                      |                                                                |
| 2  |                |                      |                                                                |
| 3  |                |                      |                                                                |
| 4  |                |                      |                                                                |
| 5  |                |                      |                                                                |
| 6  | Bias           | <a href="#">#9</a>   | Describe any efforts to address potential sources of bias n/a  |
| 7  |                |                      |                                                                |
| 8  |                |                      |                                                                |
| 9  | Study size     | <a href="#">#10</a>  | Explain how the study size was arrived at 4                    |
| 10 |                |                      |                                                                |
| 11 |                |                      |                                                                |
| 12 | Quantitative   | <a href="#">#11</a>  | Explain how quantitative variables were handled in the 5       |
| 13 |                |                      |                                                                |
| 14 | variables      |                      | analyses. If applicable, describe which groupings were         |
| 15 |                |                      | chosen, and why                                                |
| 16 |                |                      |                                                                |
| 17 |                |                      |                                                                |
| 18 |                |                      |                                                                |
| 19 | Statistical    | <a href="#">#12a</a> | Describe all statistical methods, including those used to 5    |
| 20 |                |                      |                                                                |
| 21 | methods        |                      | control for confounding                                        |
| 22 |                |                      |                                                                |
| 23 |                |                      |                                                                |
| 24 |                |                      |                                                                |
| 25 | Statistical    | <a href="#">#12b</a> | Describe any methods used to examine subgroups and n/a         |
| 26 |                |                      |                                                                |
| 27 | methods        |                      | interactions                                                   |
| 28 |                |                      |                                                                |
| 29 |                |                      |                                                                |
| 30 | Statistical    | <a href="#">#12c</a> | Explain how missing data were addressed n/a                    |
| 31 |                |                      |                                                                |
| 32 | methods        |                      |                                                                |
| 33 |                |                      |                                                                |
| 34 |                |                      |                                                                |
| 35 |                |                      |                                                                |
| 36 | Statistical    | <a href="#">#12d</a> | If applicable, explain how loss to follow-up was addressed n/a |
| 37 |                |                      |                                                                |
| 38 | methods        |                      |                                                                |
| 39 |                |                      |                                                                |
| 40 |                |                      |                                                                |
| 41 | Statistical    | <a href="#">#12e</a> | Describe any sensitivity analyses n/a                          |
| 42 |                |                      |                                                                |
| 43 | methods        |                      |                                                                |
| 44 |                |                      |                                                                |
| 45 |                |                      |                                                                |
| 46 | <b>Results</b> |                      |                                                                |
| 47 |                |                      |                                                                |
| 48 |                |                      |                                                                |
| 49 | Participants   | <a href="#">#13a</a> | Report numbers of individuals at each stage of study—eg 5      |
| 50 |                |                      |                                                                |
| 51 |                |                      | numbers potentially eligible, examined for eligibility,        |
| 52 |                |                      | confirmed eligible, included in the study, completing follow-  |
| 53 |                |                      |                                                                |
| 54 |                |                      |                                                                |
| 55 |                |                      |                                                                |
| 56 |                |                      |                                                                |
| 57 |                |                      |                                                                |
| 58 |                |                      |                                                                |
| 59 |                |                      |                                                                |
| 60 |                |                      |                                                                |

up, and analysed. Give information separately for for  
exposed and unexposed groups if applicable.

|                  |                      |                                                                                                                                                                                                                   |     |
|------------------|----------------------|-------------------------------------------------------------------------------------------------------------------------------------------------------------------------------------------------------------------|-----|
| Participants     | <a href="#">#13b</a> | Give reasons for non-participation at each stage                                                                                                                                                                  | n/a |
| Participants     | <a href="#">#13c</a> | Consider use of a flow diagram                                                                                                                                                                                    | n/a |
| Descriptive data | <a href="#">#14a</a> | Give characteristics of study participants (eg demographic, clinical, social) and information on exposures and potential confounders. Give information separately for exposed and unexposed groups if applicable. | 5   |
| Descriptive data | <a href="#">#14b</a> | Indicate number of participants with missing data for each variable of interest                                                                                                                                   | 5   |
| Descriptive data | <a href="#">#14c</a> | Summarise follow-up time (eg, average and total amount)                                                                                                                                                           | n/a |
| Outcome data     | <a href="#">#15</a>  | Report numbers of outcome events or summary measures over time. Give information separately for exposed and unexposed groups if applicable.                                                                       | 6   |
| Main results     | <a href="#">#16a</a> | Give unadjusted estimates and, if applicable, confounder-adjusted estimates and their precision (eg, 95% confidence interval). Make clear which confounders were adjusted for and why they were included          | 6   |
| Main results     | <a href="#">#16b</a> | Report category boundaries when continuous variables were categorized                                                                                                                                             | n/a |
| Main results     | <a href="#">#16c</a> | If relevant, consider translating estimates of relative risk into absolute risk for a meaningful time period                                                                                                      | n/a |

|    |                          |                     |                                                                 |     |
|----|--------------------------|---------------------|-----------------------------------------------------------------|-----|
| 1  | Other analyses           | <a href="#">#17</a> | Report other analyses done—eg analyses of subgroups             | 6   |
| 2  |                          |                     |                                                                 |     |
| 3  |                          |                     | and interactions, and sensitivity analyses                      |     |
| 4  |                          |                     |                                                                 |     |
| 5  |                          |                     |                                                                 |     |
| 6  | <b>Discussion</b>        |                     |                                                                 |     |
| 7  |                          |                     |                                                                 |     |
| 8  |                          |                     |                                                                 |     |
| 9  | Key results              | <a href="#">#18</a> | Summarise key results with reference to study objectives        | 7   |
| 10 |                          |                     |                                                                 |     |
| 11 |                          |                     |                                                                 |     |
| 12 | Limitations              | <a href="#">#19</a> | Discuss limitations of the study, taking into account           | 8   |
| 13 |                          |                     |                                                                 |     |
| 14 |                          |                     | sources of potential bias or imprecision. Discuss both          |     |
| 15 |                          |                     | direction and magnitude of any potential bias.                  |     |
| 16 |                          |                     |                                                                 |     |
| 17 | Interpretation           | <a href="#">#20</a> | Give a cautious overall interpretation considering              | 8   |
| 18 |                          |                     |                                                                 |     |
| 19 |                          |                     | objectives, limitations, multiplicity of analyses, results from |     |
| 20 |                          |                     | similar studies, and other relevant evidence.                   |     |
| 21 |                          |                     |                                                                 |     |
| 22 | Generalisability         | <a href="#">#21</a> | Discuss the generalisability (external validity) of the study   | n/a |
| 23 |                          |                     | results                                                         |     |
| 24 |                          |                     |                                                                 |     |
| 25 |                          |                     |                                                                 |     |
| 26 |                          |                     |                                                                 |     |
| 27 | <b>Other Information</b> |                     |                                                                 |     |
| 28 |                          |                     |                                                                 |     |
| 29 | Funding                  | <a href="#">#22</a> | Give the source of funding and the role of the funders for      | 10  |
| 30 |                          |                     |                                                                 |     |
| 31 |                          |                     | the present study and, if applicable, for the original study    |     |
| 32 |                          |                     | on which the present article is based                           |     |
| 33 |                          |                     |                                                                 |     |
| 34 |                          |                     |                                                                 |     |
| 35 |                          |                     |                                                                 |     |
| 36 |                          |                     |                                                                 |     |
| 37 |                          |                     |                                                                 |     |
| 38 |                          |                     |                                                                 |     |
| 39 |                          |                     |                                                                 |     |
| 40 |                          |                     |                                                                 |     |
| 41 |                          |                     |                                                                 |     |
| 42 |                          |                     |                                                                 |     |
| 43 |                          |                     |                                                                 |     |

44 None The STROBE checklist is distributed under the terms of the Creative Commons Attribution  
 45 License CC-BY. This checklist can be completed online using <https://www.goodreports.org/>, a tool  
 46 made by the [EQUATOR Network](#) in collaboration with [Penelope.ai](#)  
 47  
 48  
 49  
 50  
 51  
 52  
 53  
 54  
 55  
 56  
 57  
 58  
 59  
 60

# BMJ Open

## Secondary attack rate of COVID-19 among contacts and risk factors, Tamil Nadu, March-May 2020: A retrospective Cohort Study

|                               |                                                                                                                                                                                                                                                                                                                                                                                                                                                                                                                                                                                                                                                                                                                                                                                                                                                                                                                                                                                                                                                                                                                                                                                                                                                                                                                                                                                                                                                                                                                                                                                                                                                                                                                                                                                                                                                                                                                                                                                                                                                                                                                                                                             |
|-------------------------------|-----------------------------------------------------------------------------------------------------------------------------------------------------------------------------------------------------------------------------------------------------------------------------------------------------------------------------------------------------------------------------------------------------------------------------------------------------------------------------------------------------------------------------------------------------------------------------------------------------------------------------------------------------------------------------------------------------------------------------------------------------------------------------------------------------------------------------------------------------------------------------------------------------------------------------------------------------------------------------------------------------------------------------------------------------------------------------------------------------------------------------------------------------------------------------------------------------------------------------------------------------------------------------------------------------------------------------------------------------------------------------------------------------------------------------------------------------------------------------------------------------------------------------------------------------------------------------------------------------------------------------------------------------------------------------------------------------------------------------------------------------------------------------------------------------------------------------------------------------------------------------------------------------------------------------------------------------------------------------------------------------------------------------------------------------------------------------------------------------------------------------------------------------------------------------|
| Journal:                      | <i>BMJ Open</i>                                                                                                                                                                                                                                                                                                                                                                                                                                                                                                                                                                                                                                                                                                                                                                                                                                                                                                                                                                                                                                                                                                                                                                                                                                                                                                                                                                                                                                                                                                                                                                                                                                                                                                                                                                                                                                                                                                                                                                                                                                                                                                                                                             |
| Manuscript ID                 | bmjopen-2021-051491.R1                                                                                                                                                                                                                                                                                                                                                                                                                                                                                                                                                                                                                                                                                                                                                                                                                                                                                                                                                                                                                                                                                                                                                                                                                                                                                                                                                                                                                                                                                                                                                                                                                                                                                                                                                                                                                                                                                                                                                                                                                                                                                                                                                      |
| Article Type:                 | Original research                                                                                                                                                                                                                                                                                                                                                                                                                                                                                                                                                                                                                                                                                                                                                                                                                                                                                                                                                                                                                                                                                                                                                                                                                                                                                                                                                                                                                                                                                                                                                                                                                                                                                                                                                                                                                                                                                                                                                                                                                                                                                                                                                           |
| Date Submitted by the Author: | 02-Sep-2021                                                                                                                                                                                                                                                                                                                                                                                                                                                                                                                                                                                                                                                                                                                                                                                                                                                                                                                                                                                                                                                                                                                                                                                                                                                                                                                                                                                                                                                                                                                                                                                                                                                                                                                                                                                                                                                                                                                                                                                                                                                                                                                                                                 |
| Complete List of Authors:     | <p>Karumanagounder, Kolandaswamy; Directorate of Public Health and Preventive Medicine<br/> Raju, Mohankumar; National Institute of Epidemiology<br/> Ponnaiah, Manickam; National Institute of Epidemiology<br/> Kaur, P; National Institute of Epidemiology<br/> viswanathan, Vidhya; National Institute of Epidemiology<br/> Rubeshkumar, Polani; National Institute of Epidemiology<br/> Sakthivel, Manikandanesan; National Institute of Epidemiology<br/> Shanmugiah, Porchelvan; National Institute of Epidemiology<br/> Ganeshkumar, Parasuraman; National Institute of Epidemiology<br/> Muthusamy, Santhosh Kumar ; National Institute of Epidemiology<br/> Sendhilkumar, Muthappan ; National Institute of Epidemiology<br/> Venkatasamy, Vettrichelvan; National Institute of Epidemiology<br/> Sambath, Irene; National Institute of Epidemiology<br/> Ilangovan, Kumaravel; National Institute of Epidemiology<br/> M, Jagadeesan; Greater Chennai Corporation<br/> Govindarajan, Rameshkumar; Directorate of Public Health and Preventive Medicine<br/> Shanmugam, Soundammal; Directorate of Public Health and Preventive Medicine<br/> Rajarathinam, Selvakumar; Directorate of Public Health and Preventive Medicine<br/> Suresh, KST; Directorate of Public Health and Preventive Medicine<br/> Varadharajan, M; Directorate of Public Health and Preventive Medicine<br/> Thiagarajan, Manivannan; Directorate of Public Health and Preventive Medicine<br/> Jagadeeshkumar, K; Directorate of Public Health and Preventive Medicine<br/> Ganesh, Velmurugan; Directorate of Public Health and Preventive Medicine<br/> Kumar, Sateesh; Directorate of Public Health and Preventive Medicine<br/> Venkatesan, Prakash; Directorate of Public Health and Preventive Medicine<br/> Nallathambi, Yogananth; Directorate of Public Health and Preventive Medicine<br/> Palani, Sampath; Directorate of Public Health and Preventive Medicine<br/> Selvavinayagam, TS; Directorate of Public Health and Preventive Medicine<br/> Reddy, Madhusudhan; Greater Chennai Corporation<br/> Rajesh, Beela; Government of Tamil Nadu, Health and Family Welfare</p> |

1  
2  
3  
4  
5  
6  
7  
8  
9  
10  
11  
12  
13  
14  
15  
16  
17  
18  
19  
20  
21  
22  
23  
24  
25  
26  
27  
28  
29  
30  
31  
32  
33  
34  
35  
36  
37  
38  
39  
40  
41  
42  
43  
44  
45  
46  
47  
48  
49  
50  
51  
52  
53  
54  
55  
56  
57  
58  
59  
60

|                                  |                                                                                                                            |
|----------------------------------|----------------------------------------------------------------------------------------------------------------------------|
|                                  | Department<br>Murhekar, Manoj; National Institute of Epidemiology                                                          |
| <b>Primary Subject Heading</b> : | Epidemiology                                                                                                               |
| Secondary Subject Heading:       | Public health                                                                                                              |
| Keywords:                        | COVID-19, Epidemiology < INFECTIOUS DISEASES, Infection control < INFECTIOUS DISEASES, Public health < INFECTIOUS DISEASES |
|                                  |                                                                                                                            |

SCHOLARONE™  
Manuscripts



I, the Submitting Author has the right to grant and does grant on behalf of all authors of the Work (as defined in the below author licence), an exclusive licence and/or a non-exclusive licence for contributions from authors who are: i) UK Crown employees; ii) where BMJ has agreed a CC-BY licence shall apply, and/or iii) in accordance with the terms applicable for US Federal Government officers or employees acting as part of their official duties; on a worldwide, perpetual, irrevocable, royalty-free basis to BMJ Publishing Group Ltd ("BMJ") its licensees and where the relevant Journal is co-owned by BMJ to the co-owners of the Journal, to publish the Work in this journal and any other BMJ products and to exploit all rights, as set out in our [licence](#).

The Submitting Author accepts and understands that any supply made under these terms is made by BMJ to the Submitting Author unless you are acting as an employee on behalf of your employer or a postgraduate student of an affiliated institution which is paying any applicable article publishing charge ("APC") for Open Access articles. Where the Submitting Author wishes to make the Work available on an Open Access basis (and intends to pay the relevant APC), the terms of reuse of such Open Access shall be governed by a Creative Commons licence – details of these licences and which [Creative Commons](#) licence will apply to this Work are set out in our licence referred to above.

Other than as permitted in any relevant BMJ Author's Self Archiving Policies, I confirm this Work has not been accepted for publication elsewhere, is not being considered for publication elsewhere and does not duplicate material already published. I confirm all authors consent to publication of this Work and authorise the granting of this licence.



1  
2  
3 **Secondary attack rate of COVID-19 among contacts and risk factors, Tamil**  
4 **Nadu, March-May 2020: A retrospective Cohort Study**  
5  
6  
7  
8

9 Kolandaswamy Karumanagounder<sup>1</sup>, Raju Mohankumar<sup>2\*</sup>, Manickam Ponnaiah<sup>2</sup>,  
10 Prabhdeep Kaur<sup>2</sup>, Vidhya viswanathan<sup>2</sup>, Polani Rubeshkumar<sup>2</sup>, Manikandanesan  
11 Sakthivel<sup>2</sup>, Porchelvan Shanmugiah<sup>1,2</sup>, Parasuraman Ganeshkumar<sup>2</sup>, Muthusamy  
12 Santhosh kumar<sup>2</sup>, Muthappan Sendhilkumar<sup>2</sup>, Vettrichelvan Venkatasamy<sup>2</sup>, Irene  
13 Sambath<sup>2</sup>, Kumaravel Ilangovan<sup>2</sup>, Jagadeesan M<sup>3</sup>, Rameshkumar Govindarajan<sup>1</sup>,  
14 Soundammal Shanmugam<sup>1</sup>, Selvakumar Rajarathinam<sup>1</sup>, Suresh KST<sup>1</sup>, Varadharajan  
15 M<sup>1</sup>, Manivannan Thiagarajan<sup>1</sup>, Jagadeeshkumar K<sup>1</sup>, Velmurugan Ganesh<sup>1</sup>, Sateesh  
16 Kumar<sup>1</sup>, Prakash Venkatesan<sup>1</sup>, Yogananth Nallathambi<sup>1</sup>, Sampath Palani<sup>1</sup>,  
17 Selvavinayagam TS<sup>1</sup>, Madhusudhan Reddy<sup>3</sup>, Beela Rajesh<sup>4</sup>, Manoj Murhekar<sup>2</sup>  
18  
19  
20  
21  
22  
23

24 <sup>1</sup>Directorate of Public Health and Preventive Medicine, Tamil Nadu

25 <sup>2</sup>ICMR National Institute of Epidemiology, Chennai

26 <sup>3</sup>Greater Chennai Corporation, Chennai

27 <sup>4</sup>Health and Family Welfare Department, Government of Tamil Nadu  
28  
29  
30  
31  
32

33 \*Corresponding author:

34 Dr Raju Mohankumar, Consultant, ICMR-National Institute of Epidemiology, TNHB,  
35 Ayappakam, Chennai, India, PIN- 600077. Email: [mohankumar@nieicmr.org.in](mailto:mohankumar@nieicmr.org.in),  
36  
37  
38

39 Phone: +914426136333  
40

41 **Word count:** 4235

42 **Keywords:** Secondary Attack Rate, COVID-19, Contact investigation, Disease  
43 transmission, Cluster  
44  
45  
46  
47  
48  
49  
50  
51  
52  
53  
54  
55  
56  
57  
58  
59  
60

**Abstract:**

Objective: To describe the characteristics of contacts of COVID-19 case-patients in terms of time, place, and person, to calculate the secondary attack rate and factors associated with COVID-19 infection among contacts

Design: Retrospective cohort study

Setting and participants: Contacts of cases identified by the health department from March 14 to May 30, 2020, in nine of 38 administrative districts of Tamil Nadu.

Significant proportion of cases attended a religious congregation.

Outcome measure: Attack rate among the contacts and factors associated with COVID-19 positivity.

Results: We listed 15,702 contacts of 931 primary cases. Of the contacts, 89% (n=14002) were tested for COVID-19. The overall SAR was 4% (599/14002), with higher among the household contacts (13%) than the community contacts (1%). SAR among the contacts of primary cases with congregation exposure were five times higher than the contacts of non-congregation primary cases (10% Vs 2%). Being a household contact of a primary case with congregation exposure had a four-fold increased risk of getting COVID-19 (RR=16.4; 95%CI:13-20) than contact of primary case without congregation exposure. Among the symptomatic primary cases, household contacts of congregation primaries had higher RR than household contacts of other cases [(RR=25.3; 95%CI:10.2-63) Vs (RR=14.6; 95%CI:5.7-37.7)]. Among asymptomatic primary case, RR was increased among household contacts (RR=16.5; 95%CI:13.2–20.7) of congregation primaries compared to others

Conclusion: Our study showed an increase in disease transmission among household contacts than community contacts. Also, symptomatic primary cases and primary cases with exposure to the congregation had more secondary cases than others.

## Strengths and Limitations:

- **Strengths**

- We documented the secondary attack rate of COVID-19 in a large cohort of more than 15,000 contacts in India
- All the contacts were tested with RT-PCR, therefore the estimates of secondary attack rate were reliable.
- We documented high transmission among household contacts and contacts of symptomatic primary cases which guided the testing policy of the state in the early phase of the pandemic,

- **Limitations:**

- We did not have confirmation of the COVID-19 status of 11% of the contacts
- Contact tracing was prioritised for household contacts during lockdown as the community interactions were limited

## Background

The novel coronavirus outbreak due to Severe Acute Respiratory Syndrome Coronavirus 2 (SARS-CoV-2) infection reported from China in December 2019 was declared a Public Health Emergency of International Concern (PHEIC) by WHO on January 30, 2020<sup>1</sup>. At the early stages of COVID-19, international travel was the most common exposure. Subsequently, clusters emerged in various settings, including community gatherings, hospital settings, and commercial gatherings. Investigating such clusters provided clues for disease transmission and guided intervention strategies for pandemic response<sup>2</sup>. Contact tracing is one of the key strategies to interrupt the chain of transmission of SARS-CoV-2. The aim of the contact tracing strategy is to reduce secondary cases of COVID-19. In this context, the secondary attack rate of SARS-CoV-2 denotes the probability that infection occurs among susceptible contacts within a reasonable incubation period following contact with the infectious person(s) or that of the source<sup>3</sup> and represents infectiousness of the agent. The secondary attack rate among contacts thus is a useful indicator to track the viral transmission potential<sup>4</sup> and thereby guides control strategies. The secondary attack rate of SARS-CoV-2 differs from the nature of the setting and that of the symptomatic status of the primary cases.<sup>5 6 7 8</sup> Understanding the dynamics of transmission of COVID-19 for specific settings will help in preventing the spread of the infection<sup>9</sup>.

India reported the first laboratory-confirmed case on January 30, 2020, from a Southern state Kerala. In early March, most reported cases had a history of international travel or contact with the traveller<sup>10</sup>. Tamil Nadu, the southern State of India, reported the first case of COVID-19 on March 18 2020<sup>11</sup>. At the initial stages, COVID-19 cases were reported among international travellers and subsequently among travellers from other states. On March 13, the media reported a cluster of cases linked to a religious congregation in New Delhi.<sup>12 13</sup> According to the reports, the event started on February 9, 2020, with more than 4000 participants from various Indian states and abroad gathered in groups to attend the meeting.<sup>14</sup> As the participants returned to their respective states, clusters emerged in several states.<sup>15</sup> People from Tamil Nadu also participated in the meeting, predominantly during 21-23 March, 2020<sup>16</sup>. After returning from the event, attendees travelled to many parts

1  
2  
3 of the State. Public health authorities initiated a massive search for potential cases  
4 and their contact in various districts.  
5  
6

7 From February 2020, the health department of Tamil Nadu state practised testing  
8 and quarantine of international travellers and enhanced the voluntary testing of  
9 symptomatic individuals with h/o travel or h/o contact with a traveller. When the  
10 congregation cluster was reported, all the persons who attended the congregation  
11 were traced, quarantined and tested. The persons tested for COVID-19 were  
12 isolated and treated. The persons who tested negative were quarantined for 14 days.  
13 Also, the COVID-19 test was repeated after 5<sup>th</sup> day of the first testing. The household  
14 members of the attendees were immediately tested for COVID-19, if any person is  
15 tested positive.  
16  
17

18 After the information of COVID outbreak in the Delhi congregation setting, Govt of  
19 Tamil Nadu collected the line list of participants from the appropriate authority  
20 involved in the outbreak control in the congregation. The district collected additional  
21 information from the local leaders.  
22  
23

24 At the time this investigation was undertaken, there was no wide spread community  
25 transmission. Most of the infection were among travelers and health care workers,  
26 and they did not mingle with the community due to restrictions. Unlike international  
27 travelers, congregation participants travelled with other local travelers and after  
28 attending the congregation, all resumed social and work-related activities after  
29 arrival. Therefore, they are more likely to transmit to the community.  
30  
31

32 Due to the novelty of the pandemic, the transmission dynamics of the diseases were  
33 not fully understood. In the early phase, knowledge on the spread of the disease in  
34 various settings and in different geographical was not known. Also, the contribution  
35 of the congregation cluster in driving the pandemic is not known. Knowing this  
36 information was crucial in preventing the disease's spread from the primary case to  
37 the contacts. In this context, we conducted a study to estimate the secondary attack  
38 rate in terms of time, place, and person and determined risk factors for COVID-19  
39 infection among contacts during March-May 2020 in Tamil Nadu, India.  
40  
41  
42  
43  
44  
45  
46  
47  
48  
49  
50  
51  
52  
53  
54  
55

## 56 **Methods:**

### 57 **Study design**

58  
59  
60

1  
2  
3 We conducted a retrospective cohort study of all contacts of COVID-19 cases  
4 between March 14 to May 30, 2020, of Tamil Nadu, Southern India.

### 7 **Study setting and the COVID-19 context:**

9 We studied nine of 38 administrative districts reporting maximum cases during the  
10 study period (Figure 1). The study districts varied in a population density ranging  
11 from 28,553 persons per square Kilometre in the State capital city of Chennai to 367  
12 in Erode district, located southwest of Chennai. The average family size was similar  
13 in Erode district, located southwest of Chennai. The average family size was similar  
14 (3.5 to 4.3 persons per family) across these study districts.  
15

16  
17  
18 The COVID-19 response strategies implemented by the State included surveillance  
19 for case identification, confirmation with Reverse Transcriptase-Polymerase Chain  
20 Reaction (RT-PCR) test for COVID-19, contact tracing, isolation, and quarantine, in  
21 addition to community-based interventions. The confirmation with RT-PCR was done  
22 by identifying two or more target genes (E / RdRp / ORF1ab / N / S ) using multiplex  
23 PCR kits The district officials hospitalised the COVID-19 patients, and quarantined  
24 COVID-19 tested negatives at home or facility. By contact tracing, the officials  
25 identified the household and the community contacts and tested them for COVID-19.  
26 We included all COVID-19 confirmed cases in the study period from these districts.  
27  
28  
29  
30  
31  
32  
33  
34

### 35 ***Sampling and sample size***

36  
37 We listed all the identified confirmed COVID-19 cases in the study districts from  
38 March 1 to May 30, 2020. We included all the contacts of the identified COVID-19  
39 positive individuals.  
40  
41  
42  
43

### 44 ***Operational definitions:***

45  
46 Primary case: Any individual with a laboratory-confirmed COVID-19 case with no  
47 reported history of contact with COVID-19 case  
48  
49

50  
51 Symptomatic Cases: Any individual with H/O Fever, cough, Sore throat or  
52 breathlessness from 5 days before the date of testing  
53  
54

55 Confirmed Case: Any individual who is tested positive for COVID-19 using RT-PCR  
56  
57

58 Contact: Any individual comes in proximity with COVID-19 positive individuals<sup>17</sup>.  
59

60 High risk contacts is defined as any person who was in proximity with COVID-19

1  
2  
3 positive individual within 2 metres of proximity for 15 minutes. Low risk contact is  
4 defined as any person who was in proximity with COVID-19 positive individual and  
5 sharing same environment but not having high exposure.  
6  
7

8  
9 Household contact: Any individual living in the same household and comes in  
10 proximity with the COVID-19 confirmed individual  
11  
12

13  
14 Community contact: Any individual other than living in the same household and  
15 comes in proximity with the COVID-19 confirmed individual  
16  
17

18  
19 Cluster: An unusual aggregation of two or more COVID-19 cases grouped in time  
20 and space and reported to a health agency<sup>18</sup>  
21

22  
23 Congregation exposure: Individual who have attended the religious congregation  
24 event held during February and March 2020 (News paper reference)  
25

26  
27 Secondary attack rate: The secondary attack rate is the proportion of COVID-19  
28 positive individuals among the tested contacts.  
29

### 30 31 **Data collection and analysis:**

32  
33 We collected data from district surveillance records and classified the contacts as  
34 household and community contacts. We abstracted the information on  
35 sociodemographic characteristics, residence location, symptom status and  
36 congregation exposure of the primary case from the district surveillance records.  
37  
38

39  
40 We described the total number of contacts and the median number of contacts per  
41 case by the district. We calculated the overall secondary attack rate (SAR) for  
42 COVID-19 and by age, gender, symptom status and congregation exposure of the  
43 primary case. We estimated the SAR by symptom status and congregation exposure  
44 of the primary case in two subgroups, namely household and community contacts.  
45 We determined the risk factors associated with COVID-19 infection among contacts  
46 based on the household vs community exposure, congregation vs non-congregation  
47 exposure of primary case and symptom status of the primary case. We estimated the  
48 unadjusted and age/sex-adjusted relative risk (RR) and 95% confidence intervals  
49 (CI) for the four categories of contacts. The community contacts of the non-  
50 congregation primary case were the reference category. The other categories were  
51 community contacts of congregation primary, household contacts of non-  
52  
53  
54  
55  
56  
57  
58  
59  
60

1  
2  
3 congregation and household contacts of congregation primary cases. We also  
4 estimated the unadjusted and age/sex-adjusted RR and 95% CI after stratifying the  
5 four categories by symptom status of the primary case.  
6  
7

#### 8 9 **Human participation protection:**

10  
11 We obtained the approval of the Institutional Ethics Committee of the ICMR-National  
12 Institute of Epidemiology. No primary information was collected from the participants.  
13 We maintained complete confidentiality and anonymity of the participants during data  
14 abstraction.  
15  
16  
17  
18

19 **Patient and Public Involvement in research:** Not involved in the conduct of  
20 research  
21  
22

#### 23 **Results:**

##### 24 ***Description of the cases and contacts***

25  
26 We identified 931 COVID-19 primary cases and 15,702 contacts during the study  
27 period. The median number of contacts identified per COVID-19 case was 17 (IQR:  
28 9, 18) in the selected nine districts. Around 11% (n=102) of the cases did not have  
29 household contacts. The duration from the reporting of the first COVID-19 case to  
30 the time of data abstraction ranged from 51 days for Chennai and 15 days for Karur  
31 district. (Table 1).  
32  
33  
34  
35  
36  
37

38 Of the identified 15,702 contacts, 14,002 (89%) contacts were tested for COVID-19.  
39 Apart from household contacts, most community contacts (98%) were cab-drivers,  
40 vegetable sellers, co-workers, or co-passengers in public transport. The majority of  
41 the household contacts (99%) were tested. There is no difference between tested  
42 and not-tested by age and gender (data not shown).  
43  
44  
45  
46  
47

48 Information on age was available for 99.7% (13,969/14,002) of the contacts (Table  
49 2). The contacts were predominantly aged 21-40 years (41%) and 41 to 59 years  
50 (27%). Over half of the contacts were males (53%). About one-fourth (28%) of the  
51 contacts were traced from primary cases with congregation exposure, and 25% of  
52 the contacts had household COVID-19 exposure. Healthcare providers contributed  
53 to less than 1% of the contacts identified for the primary cases.  
54  
55  
56  
57

##### 58 ***Secondary attack rate by selected characteristics***



1  
2  
3 Among tested contacts (n=14002), 599 (4.3%) tested positive for COVID-19 based  
4 on RT PCR. The overall secondary attack rate was 4% (599 of 14,002). The  
5 secondary attack rate was similar across the age groups and gender, ranging from  
6 4% to 5%. The secondary attack rate among the contacts of primary cases with  
7 congregation exposure was five times higher (10%) than contacts of non-  
8 congregation primary cases (2%). Of the 599 contacts who tested positive, more  
9 than three-fourths (78%) were household contacts.

10 The overall secondary attack rate was 4%, with 13% among the household contacts  
11 compared to 1% among the community contacts. The secondary attack among  
12 household contacts of primary cases with exposure to congregation was higher  
13 (21%) than the contacts of primary cases without congregation exposure (6%) (Table  
14 3). The primary cases' symptomatic status was available for 95% (13,338) of the  
15 tested contacts. The overall secondary attack among contacts of the primary cases  
16 with COVID -19 symptoms was 6% compared to 4% among the contacts of  
17 asymptomatic cases. The household contacts exposed to the symptomatic primary  
18 case had two times higher attack rate as compared to contacts of asymptomatic  
19 primary cases (25% vs 12%). Secondary attack among the community contacts was  
20 similar irrespective of the symptomatic status of the primary case.

### 21 ***Risk factors for secondary cases***

22 We estimated the risk of acquiring infection for contacts by type of contact and  
23 congregation participation of the primary cases. There was no significant risk among  
24 the community contacts of the primary cases irrespective of the participation in the  
25 congregation. The relative risk of household contacts of primary cases with  
26 congregation participation was four times higher (RR=16.4; 95% CI: 13.3 to 20.2) in  
27 getting COVID-19 compared to household contacts of other primary cases (RR=4.9;  
28 95% CI: 3.81 to 6.38). The association did not change even after adjusting for age  
29 and gender. (Table 4)

30 We estimated the RR stratified by the symptomatic status of the primary cases. In  
31 the strata where the primary case was symptomatic, there was an eight-fold increase  
32 in RR for household contacts of congregation participants when compared to the  
33 household contacts of other cases [RR=25.3,95% CI: 10.2 to 63) vs RR= 14.6, 95%  
34 CI: 5.7 to 37.7)]. If the primary case was asymptomatic, there was no increase in RR  
35 for community contacts of congregation participants, but RR was increased among  
36

1  
2  
3 household contacts of primary cases with congregation exposure. The change in RR  
4 among household contacts of the symptomatic primary case was several folds  
5 higher as compared to household contacts of the asymptomatic primary case (Table  
6  
7  
8 5).  
9

## 10 **Discussion:**

11  
12 Our study showed an increase in disease transmission among household contacts  
13 than community contacts. The transmission was further accentuated if the primary  
14 case had symptoms or exposure to a congregation. The high risk of infection among  
15 family members was consistent with the pooled analysis of 43 studies which  
16 estimated an SAR of 18% among household contacts<sup>19</sup>. Other systematic reviews  
17 demonstrated a secondary attack rate of 16.6%<sup>20</sup> and 27%<sup>21</sup> compared to our study.  
18 This may probably due to the timeline of our study in early part of the pandemic. We  
19 also observed very low SAR (1%) among non-household contacts, possibly due to  
20 the State's lockdown situation during the study period. Contact tracing is one of the  
21 core public health strategies for COVID-19 control, and our study assessed if  
22 districts implemented this strategy. Although the median number of contacts per  
23 case was 17, there was a high variation between districts due to limiting the contact  
24 tracing to only household contacts in several cases. A study in the UK measuring the  
25 efficacy of contact tracing for COVID-19 suggested an average of 36 contacts must  
26 be traced per case<sup>22</sup>. Another study in the Republic of Korea shows a range of 15-  
27 649 contacts traced per case<sup>23</sup>. Once the number of cases increases, extensive  
28 contact tracing may not be feasible unless we deploy dedicated human resources  
29 and train the contact tracers. There was limited capacity in the initial phase of the  
30 epidemic; however, the public health department added human resources, especially  
31 in the capital city of Chennai, to sustain the contact tracing as cases started  
32 increasing.  
33  
34

35 We observed a higher attack rate among household contacts (25%) of symptomatic  
36 primary cases when compared to asymptomatic. Our observations were similar to a  
37 pooled analysis of three studies from Wei et al.<sup>24</sup>, Part et al.<sup>25</sup>, Chaw et al.<sup>26</sup>, which  
38 reported 20% SAR among household contacts of symptomatic primary cases<sup>27</sup>. This  
39 observation guided the testing policy in the context of limited resources at the peak  
40 of the pandemic. We prioritised the testing of household contacts of symptomatic  
41 primary cases in the subsequent phases of pandemic at times of resource  
42  
43  
44  
45  
46  
47  
48  
49  
50  
51  
52  
53  
54  
55  
56  
57  
58  
59  
60

1  
2  
3 constraints. Although the attack rate was lower among contacts of asymptomatic  
4 primary, the transmission did take place especially in the household setting. Our  
5 findings support the rationale of isolation of all cases irrespective of the symptoms  
6 and testing of all household contacts to break the chain of transmission<sup>28</sup>.  
7  
8  
9

10 The congregation clusters were one of the sources which led to COVID-19  
11 transmission in various communities<sup>29</sup>. Similar to our setting, many countries  
12 experienced clusters emerging from congregation settings. In South Korea, an  
13 explosive outbreak happened following a social event held at a Church and is  
14 attributable to 84% of the total confirmed cases of South Korea reported till mid-  
15 March<sup>30</sup>. Another study in Jordan among the wedding attendees reported a higher  
16 attack rate of 22%<sup>31</sup>. Similar clusters had been reported in different parts of South  
17 Korea<sup>32</sup>, and in the USA, a secondary attack of 53.3% was estimated among one  
18 such event attendees<sup>33</sup>. In addition to the effect of disease spread within the cluster,  
19 the attendees returned from the congregation involved themselves in the routine  
20 duties and social activities, which led to further spread of the disease in the  
21 community. Avoiding any type of gathering is one of the essential mitigation  
22 measures to be followed strictly. Government actions to ban mass gatherings are  
23 essential, as are good diagnostic facilities and remotely accesses health advice,  
24 together with specialised treatment for people with severe disease<sup>34</sup>.  
25  
26  
27  
28  
29  
30  
31  
32  
33  
34  
35  
36

37 Our study has several limitations. We did not have confirmation of the COVID-19  
38 status of 11% of the contacts, who were mostly community contacts. Hence, this  
39 may have over-estimated the overall secondary attack rate by 0.3%. Contact tracing  
40 was prioritised for household contacts due to restricted mobility and limited  
41 interactions at the community level. Therefore, secondary attack among non-  
42 household contacts may not reflect the real transmission potential. Information  
43 regarding symptoms was retrieved from district surveillance records. The symptom  
44 status was collected at the time of diagnosis. We could not verify if the primary case  
45 developed symptoms later in the course of illness. Hence, there was a chance of  
46 misclassification of symptom status.  
47  
48  
49  
50  
51  
52  
53

54 We conclude that COVID-19 transmission was higher among household contacts,  
55 contacts of symptomatic primary case, and contacts of primary cases exposed to the  
56 congregation. Based on the findings, we informed the testing policy and contact  
57 tracing strategy in the early stages of the COVID-19 epidemic in Tamil Nadu. We  
58  
59  
60

1  
2  
3 recommend testing all household contacts irrespective of the symptoms and  
4 extensive contact tracing and testing in case of super spreader events. In resource-  
5 constrained settings, all contacts of symptomatic primary cases should be prioritised  
6 for testing. The gatherings should be restricted to prevent significant clusters.  
7  
8  
9

10  
11  
12 **Author Contributions:** KK, RMK, MP, and PK designed the study, supervised  
13 fieldwork, did primary data collection, planned data analysis and wrote the first draft  
14 of the manuscript. VV, PRK, MS, PS, PG and MSK did primary data collection and  
15 did data analysis. SM, VV, IS, and KI supervised fieldwork and data management.  
16 JM, RG, SS, SR, SKST, VM, MT, JK, VG, and SK supervised fieldwork and  
17 supported data collection. PV, YN, SP, STS, MR, BR and MM conceptualised the  
18 study and gave critical comments in finalising the manuscript. All authors approved  
19 the final manuscript  
20  
21  
22  
23  
24  
25  
26  
27  
28

29 **Funding:**

30 This work was supported by ICMR-National Institute of Chennai intramural funds.  
31  
32

33 **Award/Grant number:** Not applicable  
34

35 **Competing interests:** None declared  
36  
37

38 **Patient consent for publication:** Not required  
39

40 **Ethics approval:** Institutional Ethics Committee of ICMR-National Institute of  
41 Epidemiology, Chennai, approved the study. Written consent was not required for  
42 this study  
43  
44

45 **Provenance and peer review:** Not commissioned; externally peer-reviewed.  
46  
47

48 **Data availability statement:** Data are available upon reasonable request  
49

50 **Trial registration:** Not applicable  
51  
52  
53  
54  
55  
56  
57  
58  
59  
60

1  
2  
3  
4  
5  
6  
7  
8  
9  
10  
11  
12  
13  
14  
15  
16  
17  
18  
19  
20  
21  
22  
23  
24  
25  
26  
27  
28  
29  
30  
31  
32  
33  
34  
35  
36  
37  
38  
39  
40  
41  
42  
43  
44  
45  
46  
47  
48  
49  
50  
51  
52  
53  
54  
55  
56  
57  
58  
59  
60

**Figure 1:** Map of Tamil Nadu included in the epidemiological study of COVID-19

For peer review only

**Table 1: Frequency of contacts traced per COVID-19 primary case by district, Tamil Nadu, India, March-May, 2020**

| District    | Days since reporting of the first case in the district | # Primary Cases | Frequency of contacts |                    |                    |                                          | No. of contacts tested | No of contacts tested positive | SAR           |
|-------------|--------------------------------------------------------|-----------------|-----------------------|--------------------|--------------------|------------------------------------------|------------------------|--------------------------------|---------------|
|             |                                                        |                 | # Contacts identified | Household contacts | Community Contacts | Median (Range) contacts per Primary case |                        |                                |               |
| Chennai     | 51                                                     | 530             | 9731                  | 1795               | 7936               | 18 (1 to 151)                            | 9724                   | 261                            | 3 (2.4-3.0)   |
| Coimbatore  | 33                                                     | 151             | 3257                  | 570                | 2687               | 22 (1 to 274)                            | 1585                   | 151                            | 10(8.2-11.1)  |
| Erode       | 46                                                     | 56              | 1032                  | 246                | 786                | 18 (3 to 141)                            | 1032                   | 38                             | 4 (2.7-5.0)   |
| Karur       | 15                                                     | 42              | 416                   | 271                | 145                | 10 (1 to 86)                             | 416                    | 18                             | 4(2.8-6.7)    |
| Ranipet     | 25                                                     | 29              | 273                   | 153                | 120                | 9 (1 to 68)                              | 273                    | 11                             | 4(2.3-7.1)    |
| Tirunelveli | 23                                                     | 35              | 166                   | 157                | 9                  | 5 (1 to 21)                              | 145                    | 20                             | 14(9.1-20.0)  |
| Tirupathur  | 20                                                     | 12              | 312                   | 61                 | 251                | 26 (1 to 100)                            | 312                    | 5                              | 2(0.7-3.7)    |
| Tiruppur    | 24                                                     | 66              | 279                   | 241                | 38                 | 5 (1 to 10)                              | 279                    | 80                             | 29(23.7-34.0) |
| Vellore     | 23                                                     | 10              | 236                   | 51                 | 185                | 24 (6 to 79)                             | 236                    | 15                             | 6(3.9-10.0)   |
| Overall     |                                                        | 931             | 15,702                | 3545               | 12157              | 17(5 to 26)                              | 14002                  | 599                            | 4(4.0-4.6)    |

**Table 2: Secondary Attack Rate (%) by selected characteristics among the contacts traced per COVID-19 primary case, Tamil Nadu, India, March- May 2020**

| Selected characteristics                         | Number of contacts (%) | # COVID-19 Positive | Secondary attack rate % (95% CI) |
|--------------------------------------------------|------------------------|---------------------|----------------------------------|
| <b>Overall</b>                                   | <b>14002(100%)</b>     | <b>599</b>          | <b>4 (4.0-4.6)</b>               |
| Age in Years (N=13,379)                          | ≤20                    | 3203 (24%)          | 4 (3.7-5.1)                      |
|                                                  | 21-40                  | 5511 (41%)          | 4(3.8-4.9)                       |
|                                                  | 41-59                  | 3364 (25%)          | 5(4.0-5.4)                       |
|                                                  | 60+                    | 1301 (10%)          | 5 (4.0-6.4)                      |
| Gender (N=13,969)                                | Male                   | 7443 (53%)          | 4 (3.4-4.2)                      |
|                                                  | Female                 | 6526 (47%)          | 5 (4.4-5.4)                      |
| Congregation exposure of primary case (N=14,002) | Yes                    | 3884 (28%)          | 10 (8.8-10.7)                    |
|                                                  | No                     | 10,118 (72%)        | 2 (1.9-2.5)                      |
| Contact type (N=14,002)                          | Household              | 3474 (25%)          | 13 (12.3-14.5)                   |
|                                                  | Community              | 10,417 (74%)        | 1 (1.0 – 1.5)                    |
|                                                  | Healthcare personnel   | 111 (1%)            | 0                                |
| Symptom status of Primary case (N=13338)         | Symptomatic            | 607(5%)             | 6 (4.5-8.3)                      |
|                                                  | Asymptomatic           | 12,731(95%)         | 4 (3.3-4.0)                      |

**Table 3: Secondary Attack Rate among household and non-household contacts of COVID-19 individuals by type of exposure and symptom status of primary cases, Tamil Nadu, March-May, 2020 (N=14002)**

| Type of exposure or symptom status of the primary case | The secondary attack rate (%) (95% CI)<br>(# cases / # contacts of the case) |                    |                      |
|--------------------------------------------------------|------------------------------------------------------------------------------|--------------------|----------------------|
|                                                        | Household                                                                    | Community contacts | Overall              |
| <b>N = 14,002</b>                                      | <b>21 (19.0 – 22.9)</b>                                                      | <b>1 (0.6-1.5)</b> | <b>10 (8.8-10.7)</b> |
| Congregation                                           | (352/1686)                                                                   | (25/2198)          | (377/3884)           |
| No congregation                                        | <b>6 (5.2-7.5)</b>                                                           | <b>1 (1.0-1.6)</b> | <b>2 (1.9-2.5)</b>   |
|                                                        | (112/1788)                                                                   | (110/8330)         | (222/10118)          |
| <b>N= 13,338</b>                                       | <b>25 (17.6-34.1)</b>                                                        | <b>2 (1.2-3.9)</b> | <b>6 (4.5-8.3)</b>   |
| Symptomatic                                            | (26/104)                                                                     | (11/503)           | (37/607)             |
| Asymptomatic                                           | <b>12 (10.5-12.9)</b>                                                        | <b>1 (1.0-1.5)</b> | <b>4 (3.3-4)</b>     |
|                                                        | (341/2930)                                                                   | (123/9801)         | (464/12731)          |



**Table 4: Factors associated with COVID-19 among the contacts of Tamil Nadu, India March – May 2020**

| Risk factors                                            | Crude RR<br>(95% CI) | RR with age-adjusted<br>(95% CI) | RR with age and sex-<br>adjusted<br>(95% CI) |
|---------------------------------------------------------|----------------------|----------------------------------|----------------------------------------------|
| Community contacts of non-congregation<br>Primary cases | Ref                  | Ref                              | Ref                                          |
| Community contact of Congregation Primary<br>cases      | 1.0 (0.7-1.5)        | 0.9 (0.6-1.4)                    | 0.9 (0.6-1.4)                                |
| Household contacts of non-congregation<br>Primary cases | 4.9 (3.8-6.4)        | 4.7 (3.7 – 6.2)                  | 4.7 (36.4-6.1)                               |
| Household contacts of Congregation Primary<br>cases     | 16.4 (13.3–20.2)     | 16.2 (13.1-20.0)                 | 16.1 (13.0-20.0)                             |

**Table 5: Factors associated with COVID-19 among the contacts stratified by the symptomatic status of the primary cases of Tamil Nadu, India March – May 2020**

| Symptomatic Primary | Type of contacts                                     | Crude RR (95% CI)   | Adjusted RR with Age and Sex (95% CI) |
|---------------------|------------------------------------------------------|---------------------|---------------------------------------|
| Yes                 | Community contacts of non-congregation Primary cases |                     | Ref                                   |
|                     | Community contact of Congregation Primary cases      | 10.5 (6.0-33.0)     | 8.6 (2.6 – 29.1)                      |
|                     | Household contacts of non-congregation Primary cases | 15.5 (6.0-39.8)     | 14.6 (5.7 – 37.7)                     |
|                     | Household contacts of Congregation Primary cases     | 26.7 (10.8-65.9)    | 25.3 (10.2 – 63.0)                    |
| No                  | Community contacts of non-congregation Primary cases |                     | Ref                                   |
|                     | Community contact of Congregation Primary cases      | 0.9 (0.6-1.4)       | 0.9 (0.5 – 1.3)                       |
|                     | Household contacts of non-congregation Primary cases | 4.6 (3.5-6.0)       | 4.4 (3.4 – 5.8)                       |
|                     | Household contacts of Congregation Primary cases     | 16.48 (13.17-20.63) | 16.52 (13.16 – 20.74)                 |

## Reference:

<sup>1</sup> World Health Organization. Statement on the second meeting of the International Health Regulations (2005) Emergency Committee regarding the outbreak of novel coronavirus (2019-nCoV). [https://www.who.int/news-room/detail/30-01-2020-statement-on-the-second-meeting-of-the-international-health-regulations-\(2005\)-emergency-committee-regarding-the-outbreak-of-novel-coronavirus-\(2019-ncov\)](https://www.who.int/news-room/detail/30-01-2020-statement-on-the-second-meeting-of-the-international-health-regulations-(2005)-emergency-committee-regarding-the-outbreak-of-novel-coronavirus-(2019-ncov)) (2020).

<sup>2</sup> WHO; Coronavirus disease (COVID-19): Contact tracing 2020 [Available from: <https://www.who.int/news-room/q-a-detail/coronavirus-disease-covid-19-contact-tracing>.

<sup>3</sup> Halloran ME. Secondary Attack Rate. In: Peter A, Theodore C, editors. Encyclopedia of Biostatistics. New York: John Wiley & Sons Ltd; 2005

<sup>4</sup> Li W, Zhang B, Lu J, Liu S, Chang Z, Cao P, et al. The characteristics of household transmission of COVID-19. *Clinical Infectious Diseases*. 2020.

<sup>5</sup> Liu Y, Eggo RM, Kucharski AJ. Secondary attack rate and superspreading events for SARS-CoV-2. *The Lancet*. 2020 Mar 14;395(10227):e47

<sup>6</sup> Luo L, Liu D, Liao X, Wu X, Jing Q, Zheng J, Liu F, Yang S, Bi H, Li Z, Liu J. Contact settings and risk for transmission in 3410 close contacts of patients with COVID-19 in Guangzhou, China: a prospective cohort study. *Annals of internal medicine*. 2020 Aug 13

<sup>7</sup> Yang J, Zheng Y, Gou X, Pu K, Chen Z, Guo Q, et al. Prevalence of comorbidities and its effects in patients infected with SARS-CoV-2: a systematic review and meta-analysis. *International Journal of Infectious Diseases*. 2020; 94:91-5

<sup>8</sup> Cheng HY, Jian SW, Liu DP, Ng TC, Huang WT, Lin HH. High transmissibility of COVID-19 near symptom onset. *medRxiv*. 2020 Jan 1

<sup>9</sup> Wilder-Smith A, Chiew CJ, Lee VJ. Can we contain the COVID-19 outbreak with the same measures as for SARS?. *The Lancet Infectious Diseases*. 2020 Mar 5

<sup>10</sup> Jahan N, Rubeshkumar P, Karuppiyah M, Sambath I, Sendhilkumar M, Ilangovan K, et al. Entry and initial spread of COVID-19 in India: Epidemiological analysis of media surveillance data, India, 2020. *Clinical Epidemiology and Global Health*. 2020.

<sup>11</sup> MediaBulletin180320COVID19.pdf [Internet]. [cited 2020 May 31]. Available from: <https://stopcorona.tn.gov.in/wp-content/uploads/files/MediaBulletin180320COVID19.pdf>

<sup>12</sup> Ali, A. (2020, April 1). Coronavirus was a test of secular nationalism. Then Tablighi Jamaat became the scapegoat. *The Print*. <https://theprint.in/opinion/coronavirus-test-of-secular-nationalism-tablighi-jamaat-became-scapegoat/392764/>

<sup>13</sup> Gathering at Nizamuddin a highly irresponsible act, says Kejriwal. (2020, March 31). *The Hindu*. <https://www.thehindu.com/news/cities/Delhi/gathering-at-nizamuddin-a-highly-irresponsible-act-says-kejriwal/article31221982.ece>

<sup>14</sup> Chandna, H. (2020, April 18). 30% of India's Covid-19 positive caseload linked to Tablighi Jamaat meet, says govt. *The Print*. <https://theprint.in/health/30-of-indias-covid-19-positive-caseload-linked-to-tablighi-jamaat-meet-says-govt/404426/>

- 1  
2  
3  
4  
5  
6  
7  
8  
9  
10  
11  
12  
13  
14  
15  
16  
17  
18  
19  
20  
21  
22  
23  
24  
25  
26  
27  
28  
29  
30  
31  
32  
33  
34  
35  
36  
37  
38  
39  
40  
41  
42  
43  
44  
45  
46  
47  
48  
49  
50  
51  
52  
53  
54  
55  
56  
57  
58  
59  
60
- 
- <sup>15</sup> Of 14,378 total Covid-19 cases in India, 4,291 linked to Delhi's Markaz event: Health ministry. (2020, April 18). *India Today*. <https://www.indiatoday.in/india/story/coronavirus-india-total-cases-linked-tablighi-jamaat-markaz-nizamuddin-event-health-ministry-1668456-2020-04-18>
- <sup>16</sup> NDTV. 1,023 COVID-19 Cases Linked To Mosque Event, Tamil Nadu Leads: 10 Points: NDTV; [Available from: <https://www.ndtv.com/india-news/coronavirus-tablighi-jamaat-1-023-of-2-902-covid-19-cases-linked-to-mosque-event-tamil-nadu-leads-2206193>
- <sup>17</sup> National Centre for Disease Control Directorate General of Health Services MoH&FW, GOI, New Delhi The updated case definitions and contact-categorisation [internet]. [cited 2020 Jun 2]. Available from [https://nirth.res.in/virology/Revised\\_case\\_definitions\\_for\\_COVID\\_19.pdf](https://nirth.res.in/virology/Revised_case_definitions_for_COVID_19.pdf)
- <sup>18</sup> Guidelines for investigating clusters of health events. *MMWR Recomm Rep*. 1990 Jul 27;39(RR-11):1-23. PMID: 2117247. .
- <sup>19</sup> Koh WC, Naing L, Chaw L, Rosledzana MA, Alikhan MF, et al. (2020) What do we know about SARS-CoV-2 transmission? A systematic review and meta-analysis of the secondary attack rate and associated risk factors. *PLOS ONE* 15(10): e0240205. <https://doi.org/10.1371/journal.pone.0240205>
- <sup>20</sup> Madewell ZJ, Yang Y, Longini IM Jr, Halloran ME, Dean NE. Household Transmission of SARS-CoV-2: A Systematic Review and Meta-analysis. *JAMA Netw Open*. 2020 Dec 1;3(12):e2031756. doi: 10.1001/jamanetworkopen.2020.31756. PMID: 33315116; PMCID: PMC7737089.
- <sup>21</sup> Lei H, Xu X, Xiao S, Wu X, Shu Y. Household transmission of COVID-19-a systematic review and meta-analysis. *J Infect*. 2020;81(6):979-997. doi:10.1016/j.jinf.2020.08.033
- <sup>22</sup> Keeling MJ, Hollingsworth TD, Read JM. The Efficacy of Contact Tracing for the Containment of the 2019 Novel Coronavirus (COVID-19). *medRxiv*. 2020.
- <sup>23</sup> COVID-19 National Emergency Response Center Epidemiology and case management team, Korea Centers for disease Control and prevention. Coronavirus disease-19: summary of 2,370 contact investigations of the first 30 cases in the Republic of Korea. *Public Health Res Perspect*. 2020;11(2):81–84. doi: 10.24171/j.phrp.2020.11.2.04
- <sup>24</sup> Wei L, Lv Q, Wen Y, Feng S, Gao W, Chen Z, Cao B, Wu X, Lu Y, Zhao J, Zou X. Household transmission of COVID-19, Shenzhen, January-February 2020. *medRxiv*. 2020 Jan 1
- <sup>25</sup> Park SY, Kim YM, Yi S, Lee S, Na BJ, Kim CB, Kim JI, Kim HS, Kim YB, Park Y, Huh IS. Coronavirus disease outbreak in call center, South Korea. *Emerging infectious diseases*. 2020 Aug;26(8):1666.
- <sup>26</sup> Chaw, L., Koh, W., Jamaludin, S., Naing, L., Alikhan, M., & Wong, J. (2020). Analysis of SARS-CoV-2 Transmission in Different Settings, Brunei. *Emerging Infectious Diseases*, 26(11), 2598-2606. <https://dx.doi.org/10.3201/eid2611.202263>
- <sup>27</sup> Koh WC, Naing L, Chaw L, Rosledzana MA, Alikhan MF, et al. (2020) What do we know about SARS-CoV-2 transmission? A systematic review and meta-analysis of the secondary attack rate and associated risk factors. *PLOS ONE* 15(10): e0240205. <https://doi.org/10.1371/journal.pone.0240205>

- 
- 1  
2  
3  
4 28 MOHFW. Revised guidelines for Home Isolation of very mild/pre-  
5 symptomatic/asymptomatic COVID-19 cases. MOHFW 2020 July 2 [Available from  
6 [RevisedHomelsolationGuidelines.pdf \(mohfw.gov.in\)](#)  
7  
8 29 Quadri SA. COVID-19 and religious congregations: Implications for spread of novel  
9 pathogens. *International Journal of Infectious Diseases*. 2020 Jul 1;96:219-21.  
10  
11 30 Choi JY. COVID-19 in South Korea. *Postgraduate Medical Journal*. 2020;96(1137):399-  
12 402.  
13  
14 31 Yusef D, Hayajneh W, Awad S, Momany S, Khassawneh B, Samrah S, Obeidat B, Raffee  
15 L, Al-Faouri I, Issa AB, Al Zamel H. Large outbreak of coronavirus disease among wedding  
16 attendees, Jordan. *Emerging infectious diseases*. 2020 Sep;26(9):2165.  
17  
18 32 Shim E, Tariq A, Choi W, Lee Y, Chowell G. Transmission potential and severity of  
19 COVID-19 in South Korea. *International Journal of Infectious Diseases*. 2020;93:339-44.  
20  
21 33 Hamner L, Dubbel P, Capron I, Ross A, Jordan A, Lee J, et al. High SARS-CoV-2 Attack  
22 Rate Following Exposure at a Choir Practice - Skagit County, Washington, March 2020.  
23 *MMWR Morbidity and mortality weekly report*. 2020;69(19):606-10  
24  
25 34 The Times of India; Avoid mass gatherings, says govt as corona cases hit 31: [Available  
26 from:  
27 [http://timesofindia.indiatimes.com/articleshow/74520610.cms?utm\\_source=contentofinterest](http://timesofindia.indiatimes.com/articleshow/74520610.cms?utm_source=contentofinterest&utm_medium=text&utm_campaign=cppst)  
28 [&utm\\_medium=text&utm\\_campaign=cppst](http://timesofindia.indiatimes.com/articleshow/74520610.cms?utm_source=contentofinterest&utm_medium=text&utm_campaign=cppst)  
29  
30  
31  
32  
33  
34  
35  
36  
37  
38  
39  
40  
41  
42  
43  
44  
45  
46  
47  
48  
49  
50  
51  
52  
53  
54  
55  
56  
57  
58  
59  
60

Figure 1: Study district included in the epidemiology study of COVID-19,  
Tamil Nadu, India, April 2020

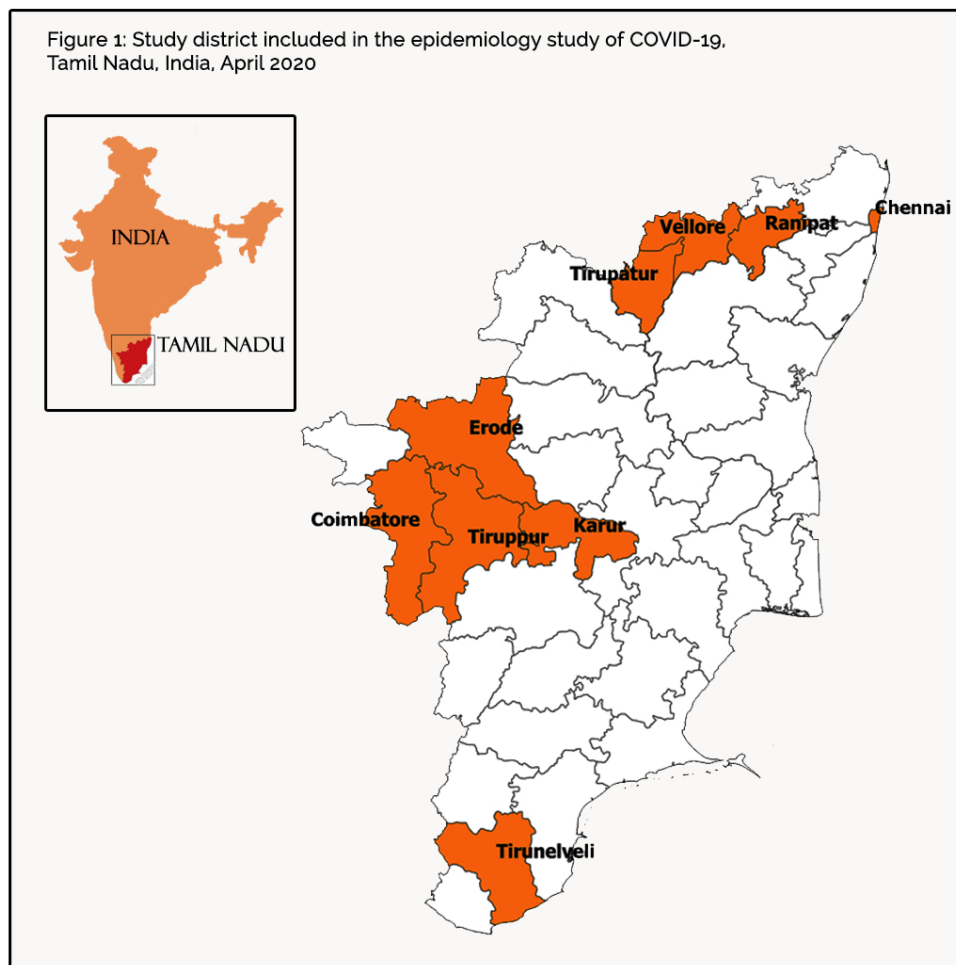

Map of Tamil Nadu included in the epidemiological study of COVID-19. There are nine of the 38 districts included in the study.

90x90mm (300 x 300 DPI)

# Reporting checklist for cohort study.

Based on the STROBE cohort guidelines.

## Instructions to authors

Complete this checklist by entering the page numbers from your manuscript where readers will find each of the items listed below.

Your article may not currently address all the items on the checklist. Please modify your text to include the missing information. If you are certain that an item does not apply, please write "n/a" and provide a short explanation.

Upload your completed checklist as an extra file when you submit to a journal.

In your methods section, say that you used the STROBE cohort reporting guidelines, and cite them as:

von Elm E, Altman DG, Egger M, Pocock SJ, Gøtzsche PC, Vandenbroucke JP. The Strengthening the Reporting of Observational Studies in Epidemiology (STROBE) Statement: guidelines for reporting observational studies.

|                           | Reporting Item                                                                                         | Page Number |
|---------------------------|--------------------------------------------------------------------------------------------------------|-------------|
| <b>Title and abstract</b> |                                                                                                        |             |
| Title                     | <a href="#">#1a</a> Indicate the study's design with a commonly used term in the title or the abstract | 1           |

|    |                      |                     |                                                               |     |
|----|----------------------|---------------------|---------------------------------------------------------------|-----|
| 1  | Abstract             | <a href="#">#1b</a> | Provide in the abstract an informative and balanced           | 2   |
| 2  |                      |                     | summary of what was done and what was found                   |     |
| 3  |                      |                     |                                                               |     |
| 4  |                      |                     |                                                               |     |
| 5  |                      |                     |                                                               |     |
| 6  | <b>Introduction</b>  |                     |                                                               |     |
| 7  |                      |                     |                                                               |     |
| 8  |                      |                     |                                                               |     |
| 9  |                      |                     |                                                               |     |
| 10 | Background /         | <a href="#">#2</a>  | Explain the scientific background and rationale for the       | 3   |
| 11 | rationale            |                     | investigation being reported                                  |     |
| 12 |                      |                     |                                                               |     |
| 13 |                      |                     |                                                               |     |
| 14 |                      |                     |                                                               |     |
| 15 | Objectives           | <a href="#">#3</a>  | State specific objectives, including any prespecified         | 4   |
| 16 |                      |                     | hypotheses                                                    |     |
| 17 |                      |                     |                                                               |     |
| 18 |                      |                     |                                                               |     |
| 19 |                      |                     |                                                               |     |
| 20 | <b>Methods</b>       |                     |                                                               |     |
| 21 |                      |                     |                                                               |     |
| 22 |                      |                     |                                                               |     |
| 23 | Study design         | <a href="#">#4</a>  | Present key elements of study design early in the paper       | 4   |
| 24 |                      |                     |                                                               |     |
| 25 |                      |                     |                                                               |     |
| 26 | Setting              | <a href="#">#5</a>  | Describe the setting, locations, and relevant dates,          | 4   |
| 27 |                      |                     | including periods of recruitment, exposure, follow-up, and    |     |
| 28 |                      |                     | data collection                                               |     |
| 29 |                      |                     |                                                               |     |
| 30 |                      |                     |                                                               |     |
| 31 |                      |                     |                                                               |     |
| 32 |                      |                     |                                                               |     |
| 33 |                      |                     |                                                               |     |
| 34 | Eligibility criteria | <a href="#">#6a</a> | Give the eligibility criteria, and the sources and methods of | 5   |
| 35 |                      |                     | selection of participants. Describe methods of follow-up.     |     |
| 36 |                      |                     |                                                               |     |
| 37 |                      |                     |                                                               |     |
| 38 |                      |                     |                                                               |     |
| 39 | Eligibility criteria | <a href="#">#6b</a> | For matched studies, give matching criteria and number of     | n/a |
| 40 |                      |                     | exposed and unexposed                                         |     |
| 41 |                      |                     |                                                               |     |
| 42 |                      |                     |                                                               |     |
| 43 |                      |                     |                                                               |     |
| 44 |                      |                     |                                                               |     |
| 45 | Variables            | <a href="#">#7</a>  | Clearly define all outcomes, exposures, predictors,           | 5   |
| 46 |                      |                     | potential confounders, and effect modifiers. Give             |     |
| 47 |                      |                     | diagnostic criteria, if applicable                            |     |
| 48 |                      |                     |                                                               |     |
| 49 |                      |                     |                                                               |     |
| 50 |                      |                     |                                                               |     |
| 51 |                      |                     |                                                               |     |
| 52 |                      |                     |                                                               |     |
| 53 | Data sources /       | <a href="#">#8</a>  | For each variable of interest give sources of data and        | 5   |
| 54 | measurement          |                     | details of methods of assessment (measurement).               |     |
| 55 |                      |                     | Describe comparability of assessment methods if there is      |     |
| 56 |                      |                     |                                                               |     |
| 57 |                      |                     |                                                               |     |
| 58 |                      |                     |                                                               |     |
| 59 |                      |                     |                                                               |     |
| 60 |                      |                     |                                                               |     |



more than one group. Give information separately for for  
exposed and unexposed groups if applicable.

|                        |                      |                                                                                                                                                                               |     |
|------------------------|----------------------|-------------------------------------------------------------------------------------------------------------------------------------------------------------------------------|-----|
| Bias                   | <a href="#">#9</a>   | Describe any efforts to address potential sources of bias                                                                                                                     | n/a |
| Study size             | <a href="#">#10</a>  | Explain how the study size was arrived at                                                                                                                                     | 4   |
| Quantitative variables | <a href="#">#11</a>  | Explain how quantitative variables were handled in the analyses. If applicable, describe which groupings were chosen, and why                                                 | 5   |
| Statistical methods    | <a href="#">#12a</a> | Describe all statistical methods, including those used to control for confounding                                                                                             | 5   |
| Statistical methods    | <a href="#">#12b</a> | Describe any methods used to examine subgroups and interactions                                                                                                               | n/a |
| Statistical methods    | <a href="#">#12c</a> | Explain how missing data were addressed                                                                                                                                       | n/a |
| Statistical methods    | <a href="#">#12d</a> | If applicable, explain how loss to follow-up was addressed                                                                                                                    | n/a |
| Statistical methods    | <a href="#">#12e</a> | Describe any sensitivity analyses                                                                                                                                             | n/a |
| <b>Results</b>         |                      |                                                                                                                                                                               |     |
| Participants           | <a href="#">#13a</a> | Report numbers of individuals at each stage of study—eg numbers potentially eligible, examined for eligibility, confirmed eligible, included in the study, completing follow- | 5   |

up, and analysed. Give information separately for for  
exposed and unexposed groups if applicable.

|                  |                      |                                                                                                                                                                                                                   |     |
|------------------|----------------------|-------------------------------------------------------------------------------------------------------------------------------------------------------------------------------------------------------------------|-----|
| Participants     | <a href="#">#13b</a> | Give reasons for non-participation at each stage                                                                                                                                                                  | n/a |
| Participants     | <a href="#">#13c</a> | Consider use of a flow diagram                                                                                                                                                                                    | n/a |
| Descriptive data | <a href="#">#14a</a> | Give characteristics of study participants (eg demographic, clinical, social) and information on exposures and potential confounders. Give information separately for exposed and unexposed groups if applicable. | 5   |
| Descriptive data | <a href="#">#14b</a> | Indicate number of participants with missing data for each variable of interest                                                                                                                                   | 5   |
| Descriptive data | <a href="#">#14c</a> | Summarise follow-up time (eg, average and total amount)                                                                                                                                                           | n/a |
| Outcome data     | <a href="#">#15</a>  | Report numbers of outcome events or summary measures over time. Give information separately for exposed and unexposed groups if applicable.                                                                       | 6   |
| Main results     | <a href="#">#16a</a> | Give unadjusted estimates and, if applicable, confounder-adjusted estimates and their precision (eg, 95% confidence interval). Make clear which confounders were adjusted for and why they were included          | 6   |
| Main results     | <a href="#">#16b</a> | Report category boundaries when continuous variables were categorized                                                                                                                                             | n/a |
| Main results     | <a href="#">#16c</a> | If relevant, consider translating estimates of relative risk into absolute risk for a meaningful time period                                                                                                      | n/a |

|    |                          |                     |                                                                 |     |
|----|--------------------------|---------------------|-----------------------------------------------------------------|-----|
| 1  | Other analyses           | <a href="#">#17</a> | Report other analyses done—eg analyses of subgroups             | 6   |
| 2  |                          |                     |                                                                 |     |
| 3  |                          |                     | and interactions, and sensitivity analyses                      |     |
| 4  |                          |                     |                                                                 |     |
| 5  |                          |                     |                                                                 |     |
| 6  | <b>Discussion</b>        |                     |                                                                 |     |
| 7  |                          |                     |                                                                 |     |
| 8  |                          |                     |                                                                 |     |
| 9  |                          |                     |                                                                 |     |
| 10 | Key results              | <a href="#">#18</a> | Summarise key results with reference to study objectives        | 7   |
| 11 |                          |                     |                                                                 |     |
| 12 |                          |                     |                                                                 |     |
| 13 | Limitations              | <a href="#">#19</a> | Discuss limitations of the study, taking into account           | 8   |
| 14 |                          |                     |                                                                 |     |
| 15 |                          |                     | sources of potential bias or imprecision. Discuss both          |     |
| 16 |                          |                     |                                                                 |     |
| 17 |                          |                     | direction and magnitude of any potential bias.                  |     |
| 18 |                          |                     |                                                                 |     |
| 19 |                          |                     |                                                                 |     |
| 20 | Interpretation           | <a href="#">#20</a> | Give a cautious overall interpretation considering              | 8   |
| 21 |                          |                     |                                                                 |     |
| 22 |                          |                     | objectives, limitations, multiplicity of analyses, results from |     |
| 23 |                          |                     |                                                                 |     |
| 24 |                          |                     | similar studies, and other relevant evidence.                   |     |
| 25 |                          |                     |                                                                 |     |
| 26 |                          |                     |                                                                 |     |
| 27 |                          |                     |                                                                 |     |
| 28 | Generalisability         | <a href="#">#21</a> | Discuss the generalisability (external validity) of the study   | n/a |
| 29 |                          |                     |                                                                 |     |
| 30 |                          |                     | results                                                         |     |
| 31 |                          |                     |                                                                 |     |
| 32 |                          |                     |                                                                 |     |
| 33 | <b>Other Information</b> |                     |                                                                 |     |
| 34 |                          |                     |                                                                 |     |
| 35 |                          |                     |                                                                 |     |
| 36 | Funding                  | <a href="#">#22</a> | Give the source of funding and the role of the funders for      | 10  |
| 37 |                          |                     |                                                                 |     |
| 38 |                          |                     | the present study and, if applicable, for the original study    |     |
| 39 |                          |                     |                                                                 |     |
| 40 |                          |                     | on which the present article is based                           |     |
| 41 |                          |                     |                                                                 |     |
| 42 |                          |                     |                                                                 |     |
| 43 |                          |                     |                                                                 |     |

44 None The STROBE checklist is distributed under the terms of the Creative Commons Attribution  
 45 License CC-BY. This checklist can be completed online using <https://www.goodreports.org/>, a tool  
 46 made by the [EQUATOR Network](#) in collaboration with [Penelope.ai](#)  
 47  
 48  
 49  
 50  
 51  
 52  
 53  
 54  
 55  
 56  
 57  
 58  
 59  
 60

# BMJ Open

## Secondary attack rate of COVID-19 among contacts and risk factors, Tamil Nadu, March-May 2020: A retrospective Cohort Study

|                               |                                                                                                                                                                                                                                                                                                                                                                                                                                                                                                                                                                                                                                                                                                                                                                                                                                                                                                                                                                                                                                                                                                                                                                                                                                                                                                                                                                                                                                                                                                                                                                                                                                                                                                                                                                                                                                                                                                                                                                                                                                                                                                                                                                             |
|-------------------------------|-----------------------------------------------------------------------------------------------------------------------------------------------------------------------------------------------------------------------------------------------------------------------------------------------------------------------------------------------------------------------------------------------------------------------------------------------------------------------------------------------------------------------------------------------------------------------------------------------------------------------------------------------------------------------------------------------------------------------------------------------------------------------------------------------------------------------------------------------------------------------------------------------------------------------------------------------------------------------------------------------------------------------------------------------------------------------------------------------------------------------------------------------------------------------------------------------------------------------------------------------------------------------------------------------------------------------------------------------------------------------------------------------------------------------------------------------------------------------------------------------------------------------------------------------------------------------------------------------------------------------------------------------------------------------------------------------------------------------------------------------------------------------------------------------------------------------------------------------------------------------------------------------------------------------------------------------------------------------------------------------------------------------------------------------------------------------------------------------------------------------------------------------------------------------------|
| Journal:                      | <i>BMJ Open</i>                                                                                                                                                                                                                                                                                                                                                                                                                                                                                                                                                                                                                                                                                                                                                                                                                                                                                                                                                                                                                                                                                                                                                                                                                                                                                                                                                                                                                                                                                                                                                                                                                                                                                                                                                                                                                                                                                                                                                                                                                                                                                                                                                             |
| Manuscript ID                 | bmjopen-2021-051491.R2                                                                                                                                                                                                                                                                                                                                                                                                                                                                                                                                                                                                                                                                                                                                                                                                                                                                                                                                                                                                                                                                                                                                                                                                                                                                                                                                                                                                                                                                                                                                                                                                                                                                                                                                                                                                                                                                                                                                                                                                                                                                                                                                                      |
| Article Type:                 | Original research                                                                                                                                                                                                                                                                                                                                                                                                                                                                                                                                                                                                                                                                                                                                                                                                                                                                                                                                                                                                                                                                                                                                                                                                                                                                                                                                                                                                                                                                                                                                                                                                                                                                                                                                                                                                                                                                                                                                                                                                                                                                                                                                                           |
| Date Submitted by the Author: | 13-Oct-2021                                                                                                                                                                                                                                                                                                                                                                                                                                                                                                                                                                                                                                                                                                                                                                                                                                                                                                                                                                                                                                                                                                                                                                                                                                                                                                                                                                                                                                                                                                                                                                                                                                                                                                                                                                                                                                                                                                                                                                                                                                                                                                                                                                 |
| Complete List of Authors:     | <p>Karumanagoundar, Kolandaswamy; Directorate of Public Health and Preventive Medicine<br/> Raju, Mohankumar; National Institute of Epidemiology<br/> Ponnaiah, Manickam; National Institute of Epidemiology<br/> Kaur, P; National Institute of Epidemiology<br/> viswanathan, Vidhya; National Institute of Epidemiology<br/> Rubeshkumar, Polani; National Institute of Epidemiology<br/> Sakthivel, Manikandanesan; National Institute of Epidemiology<br/> Shanmugiah, Porchelvan; National Institute of Epidemiology<br/> Ganeshkumar, Parasuraman; National Institute of Epidemiology<br/> Muthusamy, Santhosh Kumar ; National Institute of Epidemiology<br/> Sendhilkumar, Muthappan ; National Institute of Epidemiology<br/> Venkatasamy, Vettrichelvan; National Institute of Epidemiology<br/> Sambath, Irene; National Institute of Epidemiology<br/> Ilangovan, Kumaravel; National Institute of Epidemiology<br/> M, Jagadeesan; Greater Chennai Corporation<br/> Govindarajan, Rameshkumar; Directorate of Public Health and Preventive Medicine<br/> Shanmugam, Soundammal; Directorate of Public Health and Preventive Medicine<br/> Rajarathinam, Selvakumar; Directorate of Public Health and Preventive Medicine<br/> Suresh, KST; Directorate of Public Health and Preventive Medicine<br/> Varadharajan, M; Directorate of Public Health and Preventive Medicine<br/> Thiagarajan, Manivannan; Directorate of Public Health and Preventive Medicine<br/> Jagadeeshkumar, K; Directorate of Public Health and Preventive Medicine<br/> Ganesh, Velmurugan; Directorate of Public Health and Preventive Medicine<br/> Kumar, Sateesh; Directorate of Public Health and Preventive Medicine<br/> Venkatesan, Prakash; Directorate of Public Health and Preventive Medicine<br/> Nallathambi, Yogananth; Directorate of Public Health and Preventive Medicine<br/> Palani, Sampath; Directorate of Public Health and Preventive Medicine<br/> Selvavinayagam, TS; Directorate of Public Health and Preventive Medicine<br/> Reddy, Madhusudhan; Greater Chennai Corporation<br/> Rajesh, Beela; Government of Tamil Nadu, Health and Family Welfare</p> |

1  
2  
3  
4  
5  
6  
7  
8  
9  
10  
11  
12  
13  
14  
15  
16  
17  
18  
19  
20  
21  
22  
23  
24  
25  
26  
27  
28  
29  
30  
31  
32  
33  
34  
35  
36  
37  
38  
39  
40  
41  
42  
43  
44  
45  
46  
47  
48  
49  
50  
51  
52  
53  
54  
55  
56  
57  
58  
59  
60

|                                  |                                                                                                                            |
|----------------------------------|----------------------------------------------------------------------------------------------------------------------------|
|                                  | Department<br>Murhekar, Manoj; National Institute of Epidemiology                                                          |
| <b>Primary Subject Heading</b> : | Epidemiology                                                                                                               |
| Secondary Subject Heading:       | Public health                                                                                                              |
| Keywords:                        | COVID-19, Epidemiology < INFECTIOUS DISEASES, Infection control < INFECTIOUS DISEASES, Public health < INFECTIOUS DISEASES |
|                                  |                                                                                                                            |

SCHOLARONE™  
Manuscripts

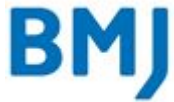

I, the Submitting Author has the right to grant and does grant on behalf of all authors of the Work (as defined in the below author licence), an exclusive licence and/or a non-exclusive licence for contributions from authors who are: i) UK Crown employees; ii) where BMJ has agreed a CC-BY licence shall apply, and/or iii) in accordance with the terms applicable for US Federal Government officers or employees acting as part of their official duties; on a worldwide, perpetual, irrevocable, royalty-free basis to BMJ Publishing Group Ltd ("BMJ") its licensees and where the relevant Journal is co-owned by BMJ to the co-owners of the Journal, to publish the Work in this journal and any other BMJ products and to exploit all rights, as set out in our [licence](#).

The Submitting Author accepts and understands that any supply made under these terms is made by BMJ to the Submitting Author unless you are acting as an employee on behalf of your employer or a postgraduate student of an affiliated institution which is paying any applicable article publishing charge ("APC") for Open Access articles. Where the Submitting Author wishes to make the Work available on an Open Access basis (and intends to pay the relevant APC), the terms of reuse of such Open Access shall be governed by a Creative Commons licence – details of these licences and which [Creative Commons](#) licence will apply to this Work are set out in our licence referred to above.

Other than as permitted in any relevant BMJ Author's Self Archiving Policies, I confirm this Work has not been accepted for publication elsewhere, is not being considered for publication elsewhere and does not duplicate material already published. I confirm all authors consent to publication of this Work and authorise the granting of this licence.

1  
2  
3 1 **Secondary attack rate of COVID-19 among contacts and risk factors, Tamil**  
4  
5 2 **Nadu, March-May 2020: A retrospective Cohort Study**  
6  
7 3  
8

9 4 Kolandaswamy Karumanagounder<sup>1</sup>, Raju Mohankumar<sup>2\*</sup>, Manickam Ponnaiah<sup>2</sup>,  
10 5 Prabhdeep Kaur<sup>2</sup>, Vidhya viswanathan<sup>2</sup>, Polani Rubeshkumar<sup>2</sup>, Manikandanesan  
11 6 Sakthivel<sup>2</sup>, Porchelvan Shanmugiah<sup>1,2</sup>, Parasuraman Ganeshkumar<sup>2</sup>, Muthusamy  
12 7 Santhosh kumar<sup>2</sup>, Muthappan Sendhilkumar<sup>2</sup>, Vettrichelvan Venkatasamy<sup>2</sup>, Irene  
13 8 Sambath<sup>2</sup>, Kumaravel Ilangovan<sup>2</sup>, Jagadeesan M<sup>3</sup>, Rameshkumar Govindarajan<sup>1</sup>,  
14 9 Soundammal Shanmugam<sup>1</sup>, Selvakumar Rajarathinam<sup>1</sup>, Suresh KST<sup>1</sup>, Varadharajan  
15 10 M<sup>1</sup>, Manivannan Thiagarajan<sup>1</sup>, Jagadeeshkumar K<sup>1</sup>, Velmurugan Ganesh<sup>1</sup>, Sateesh  
16 11 Kumar<sup>1</sup>, Prakash Venkatesan<sup>1</sup>, Yogananth Nallathambi<sup>1</sup>, Sampath Palani<sup>1</sup>,  
17 12 Selvavinayagam TS<sup>1</sup>, Madhusudhan Reddy<sup>3</sup>, Beela Rajesh<sup>4</sup>, Manoj Murhekar<sup>2</sup>  
18  
19  
20  
21  
22  
23

24 14 <sup>1</sup>Directorate of Public Health and Preventive Medicine, Tamil Nadu

25 15 <sup>2</sup>ICMR National Institute of Epidemiology, Chennai

26 16 <sup>3</sup>Greater Chennai Corporation, Chennai

27 17 <sup>4</sup>Health and Family Welfare Department, Government of Tamil Nadu  
28  
29  
30  
31  
32

33 19 \*Corresponding author:

34 20 Dr Raju Mohankumar, Consultant, ICMR-National Institute of Epidemiology, TNHB,

35 21 Ayappakam, Chennai, India, PIN- 600077. Email: [mohankumar@nieicmr.org.in](mailto:mohankumar@nieicmr.org.in),

36 22 Phone: +914426136333  
37  
38  
39  
40

41 23 **Word count:** 4389

42  
43 24 **Keywords:** Secondary Attack Rate, COVID-19, Contact investigation, Disease  
44 25 transmission, Cluster  
45  
46  
47  
48  
49  
50  
51  
52  
53  
54  
55  
56  
57  
58  
59  
60

1  
2  
3 27 **Abstract:**  
4

5 28 Objective: To describe the characteristics of contacts of COVID-19 case-patients in  
6  
7 29 terms of time, place, and person, to calculate the secondary attack rate and factors  
8  
9 30 associated with COVID-19 infection among contacts

10  
11 31 Design: Retrospective cohort study  
12

13 32 Setting and participants: Contacts of cases identified by the health department from  
14  
15 33 March 14 to May 30, 2020, in nine of 38 administrative districts of Tamil Nadu.

16 34 Significant proportion of cases attended a religious congregation.  
17

18  
19 35 Outcome measure: Attack rate among the contacts and factors associated with  
20  
21 36 COVID-19 positivity.  
22

23 37 Results: We listed 15,702 contacts of 931 primary cases. Of the contacts, 89%  
24  
25 38 (n=14002) were tested for COVID-19. The overall SAR was 4% (599/14002), with  
26  
27 39 higher among the household contacts (13%) than the community contacts (1%).  
28  
29 40 SAR among the contacts of primary cases with congregation exposure were five  
30  
31 41 times higher than the contacts of non-congregation primary cases (10% Vs 2%).  
32  
33 42 Being a household contact of a primary case with congregation exposure had a four-  
34  
35 43 fold increased risk of getting COVID-19 (RR=16.4; 95%CI:13-20) than contact of  
36  
37 44 primary case without congregation exposure. Among the symptomatic primary  
38  
39 45 cases, household contacts of congregation primaries had higher RR than household  
40  
41 46 contacts of other cases [(RR=25.3; 95%CI:10.2-63) Vs (RR=14.6; 95%CI:5.7-37.7)].  
42  
43 47 Among asymptomatic primary case, RR was increased among household contacts  
44  
45 48 (RR=16.5; 95%CI:13.2–20.7) of congregation primaries compared to others

46  
47 49 Conclusion: Our study showed an increase in disease transmission among  
48  
49 50 household contacts than community contacts. Also, symptomatic primary cases and  
50  
51 51 primary cases with exposure to the congregation had more secondary cases than  
52  
53  
54  
55  
56  
57  
58  
59  
60  
52 others.



1  
2  
3 53 **Strengths and Limitations:**  
4

5 54 • **Strengths**

- 6  
7  
8 55 ○ We documented the secondary attack rate of COVID-19 in a large  
9 56 cohort of more than 15,000 contacts in India  
10  
11 57 ○ All the contacts were tested with RT-PCR; therefore, the estimates of  
12 58 secondary attack rate were reliable.  
13  
14 59 ○ The state updated the testing policy in the early phase of this pandemic  
15 60 based on the findings from this study.

16  
17  
18  
19 61 • **Limitations:**

- 20  
21  
22 62 ○ We did not have confirmation of the COVID-19 status of 11% of the  
23 63 contacts  
24  
25 64 ○ Contact tracing was prioritised for household contacts during lockdown  
26 65 as the community interactions were limited  
27  
28  
29  
30  
31  
32  
33  
34  
35  
36  
37  
38  
39  
40  
41  
42  
43  
44  
45  
46  
47  
48  
49  
50  
51  
52  
53  
54  
55  
56  
57  
58  
59  
60

## 66 **Background**

67 The novel coronavirus outbreak due to Severe Acute Respiratory Syndrome  
68 Coronavirus 2 (SARS-CoV-2) infection reported from China in December 2019 was  
69 declared a Public Health Emergency of International Concern (PHEIC) by WHO on  
70 January 30, 2020<sup>1</sup>. At the early stages of COVID-19, international travel was the  
71 most common exposure. Subsequently, clusters emerged in various settings,  
72 including community gatherings, hospital settings, and commercial gatherings.  
73 Investigating such clusters provided clues for disease transmission and guided  
74 intervention strategies for pandemic response<sup>2</sup>. Contact tracing is one of the key  
75 strategies to interrupt the chain of transmission of SARS-CoV-2. The aim of the  
76 contact tracing strategy is to reduce secondary cases of COVID-19. In this context,  
77 the secondary attack rate of SARS-CoV-2 denotes the probability that infection  
78 occurs among susceptible contacts within a reasonable incubation period following  
79 contact with the infectious person(s) or that of the source<sup>3</sup> and represents  
80 infectiousness of the agent. The secondary attack rate among contacts thus is a  
81 useful indicator to track the viral transmission potential<sup>4</sup> and thereby guides control  
82 strategies. The secondary attack rate of SARS-CoV-2 differs from the nature of the  
83 setting and that of the symptomatic status of the primary cases.<sup>5 6 7 8</sup> Understanding  
84 the dynamics of transmission of COVID-19 for specific settings will help in preventing  
85 the spread of the infection<sup>9</sup>.

86 India reported the first laboratory-confirmed case on January 30, 2020, from a  
87 Southern state Kerala. In early March, most reported cases had a history of  
88 international travel or contact with the traveller<sup>10</sup>. Tamil Nadu, the southern State of  
89 India, reported the first case of COVID-19 on March 18 2020<sup>11</sup>. At the initial stages,  
90 COVID-19 cases were reported among international travellers and subsequently  
91 among travellers from other states. On March 13, the media reported a cluster of  
92 cases linked to a religious congregation in New Delhi.<sup>12 13</sup> According to the reports,  
93 the event started on February 9, 2020, with more than 4000 participants from various  
94 Indian states and abroad gathered in groups to attend the meeting.<sup>14</sup> As the  
95 participants returned to their respective states, clusters emerged in several states.<sup>15</sup>  
96 People from Tamil Nadu also participated in the meeting, predominantly during 21-  
97 23 March, 2020<sup>16</sup>. After returning from the event, attendees travelled to many parts

1  
2  
3 98 of the State. Public health authorities initiated a massive search for potential cases  
4  
5 99 and their contact in various districts.  
6

7 100 From February 2020, the health department of Tamil Nadu state practised testing  
8  
9 101 and quarantine of international travellers and enhanced the voluntary testing of  
10  
11 102 symptomatic individuals with h/o travel or h/o contact with a traveller. When the  
12  
13 103 congregation cluster was reported, all the persons who attended the congregation  
14  
15 104 were traced, quarantined and tested. The persons tested for COVID-19 were  
16  
17 105 isolated and treated. The persons who tested negative were quarantined for 14 days.  
18  
19 106 Also, the COVID-19 test was repeated after 5<sup>th</sup> day of the first testing. The household  
20  
21 107 members of the attendees were immediately tested for COVID-19, if any person is  
22  
23 108 tested positive.

24 109 After the information of COVID outbreak in the Delhi congregation setting, Govt of  
25  
26 110 Tamil Nadu collected the line list of participants from the appropriate authority  
27  
28 111 involved in the outbreak control in the congregation. The district collected additional  
29  
30 112 information from the local leaders.

31 113 At the time this investigation was undertaken, there was no wide spread community  
32  
33 114 transmission. Most of the infection were among travelers and health care workers,  
34  
35 115 and they did not mingle with the community due to restrictions. Unlike international  
36  
37 116 travelers, congregation participants travelled with other local travelers and after  
38  
39 117 attending the congregation, all resumed social and work-related activities after  
40  
41 118 arrival. Therefore, they are more likely to transmit to the community.

42 119 Due to the novelty of the pandemic, the transmission dynamics of the diseases were  
43  
44 120 not fully understood. In the early phase, knowledge on the spread of the disease in  
45  
46 121 various settings and in different geographical was not known. Also, the contribution  
47  
48 122 of the congregation cluster in driving the pandemic is not known. Knowing this  
49  
50 123 information was crucial in preventing the disease's spread from the primary case to  
51  
52 124 the contacts. In this context, we conducted a study to estimate the secondary attack  
53  
54 125 rate in terms of time, place, and person and determined risk factors for COVID-19  
55  
56 126 infection among contacts during March-May 2020 in Tamil Nadu, India.

## 57 127 **Methods:**

### 58 128 **Study design**

59  
60

1  
2  
3 129 We conducted a retrospective cohort study of all contacts of COVID-19 cases  
4  
5 130 between March 14 to May 30, 2020, of Tamil Nadu, Southern India.  
6

7 131 **Study setting and the COVID-19 context:**  
8

9 132 We studied nine of 38 administrative districts reporting maximum cases during the  
10 133 study period (Figure 1). These nine districts reported higher number of cases during  
11 134 the study period. The study districts varied in a population density ranging from  
12 135 28,553 persons per square Kilometre in the State capital city of Chennai to 367 in  
13 136 Erode district, located southwest of Chennai. The average family size was similar  
14 137 (3.5 to 4.3 persons per family) across these study districts.  
15  
16  
17  
18  
19

20 138 The COVID-19 response strategies implemented by the State included surveillance  
21 139 for case identification, confirmation with Reverse Transcriptase-Polymerase Chain  
22 140 Reaction (RT-PCR) test for COVID-19, contact tracing, isolation, and quarantine, in  
23 141 addition to community-based interventions. The confirmation with RT-PCR was done  
24 142 by identifying two or more target genes (E / RdRp / ORF1ab / N / S ) using multiplex  
25 143 PCR kits The district officials hospitalised the COVID-19 patients, and quarantined  
26 144 COVID-19 tested negatives at home or facility. By contact tracing, the officials  
27 145 identified the household and the community contacts and tested them for COVID-19.  
28 146 We included all COVID-19 confirmed cases in the study period from these districts.  
29  
30  
31  
32  
33  
34  
35  
36

37 147 **Sampling and sample size**  
38

39 148 We listed all the identified confirmed COVID-19 cases in the study districts from  
40 149 March 1 to May 30, 2020. We included all the contacts of the identified COVID-19  
41 150 positive individuals.  
42  
43  
44  
45

46 151 **Operational definitions:**  
47

48 152 Primary case: Any individual with a laboratory-confirmed COVID-19 case with no  
49 153 reported history of contact with COVID-19 case  
50  
51

52 154 Symptomatic Cases: Any individual with H/O Fever, cough, Sore throat or  
53 155 breathlessness from 5 days before the date of testing Confirmed Case: Any individual  
54 156 who is tested positive for COVID-19 using RT-PCR  
55  
56  
57  
58

59 157 Contact: Any individual comes in proximity with COVID-19 positive individuals<sup>17</sup>.  
60

158 High risk contacts is defined as any person who was in proximity with COVID-19

1  
2  
3 159 positive individual within 2 metres of proximity for 15 minutes. Low risk contact is  
4 defined as any person who was in proximity with COVID-19 positive individual and  
5 160 sharing same environment but not having high exposure.  
6  
7 161

8  
9 162 Household contact: Any individual living in the same household and comes in  
10 proximity with the COVID-19 confirmed individual  
11 163

12  
13 164 Community contact: Any individual other than living in the same household and  
14 comes in proximity with the COVID-19 confirmed individual  
15 165

16  
17 166 Cluster: An unusual aggregation of two or more COVID-19 cases grouped in time  
18 and space and reported to a health agency<sup>18</sup>  
19 167

20 168 Congregation exposure: Individual who have attended the religious congregation  
21 event held during February and March 2020 (News paper reference)  
22 169

23  
24 170 Secondary attack rate: The secondary attack rate is the proportion of COVID-19  
25 positive individuals among the tested contacts.  
26 171

27  
28  
29  
30  
31 172 ***Data collection and analysis:***

32  
33 173 We collected data from district surveillance records and classified the contacts as  
34 household and community contacts. We abstracted the information on  
35 174 sociodemographic characteristics, residence location, symptom status and  
36 175 congregation exposure of the primary case from the district surveillance records.  
37 176

38  
39 177 The analysis is based on the information from nine identified districts. We described  
40 the total number of contacts and the median number of contacts per case by the  
41 178 district. We calculated the overall secondary attack rate (SAR) for COVID-19 and by  
42 179 age, gender, symptom status and congregation exposure of the primary case. We  
43 180 estimated the SAR by symptom status and congregation exposure of the primary  
44 181 case in two subgroups, namely household and community contacts. We determined  
45 182 the risk factors associated with COVID-19 infection among contacts based on the  
46 183 household vs community exposure, congregation vs non-congregation exposure of  
47 184 primary case and symptom status of the primary case. We estimated the unadjusted  
48 185 and age/sex-adjusted relative risk (RR) and 95% confidence intervals (CI) for the  
49 186 four categories of contacts. The community contacts of the non-congregation primary  
50 187 case were the reference category. The other categories were community contacts of  
51 188

189 congregation primary, household contacts of non-congregation and household  
190 contacts of congregation primary cases. We also estimated the unadjusted and  
191 age/sex-adjusted RR and 95% CI after stratifying the four categories by symptom  
192 status of the primary case.

### 193 **Human participation protection:**

194 We obtained the approval of the Institutional Ethics Committee of the ICMR-National  
195 Institute of Epidemiology. No primary information was collected from the participants.  
196 We maintained complete confidentiality and anonymity of the participants during data  
197 abstraction.

198 **Patient and Public Involvement in research:** Not involved in the conduct of  
199 research

### 200 **Results:**

#### 201 ***Description of the cases and contacts***

202 We identified 931 COVID-19 primary cases and 15,702 contacts during the study  
203 period. The median number of contacts identified per COVID-19 case was 17 (IQR:  
204 9, 18) in the selected nine districts. Around 11% (n=102) of the cases did not have  
205 household contacts. The duration from the reporting of the first COVID-19 case to  
206 the time of data abstraction ranged from 51 days for Chennai and 15 days for Karur  
207 district. (Table 1). This is because the reporting of the first case varies across the  
208 districts and the data collection was done in the same period across these districts  
209 and hence the duration of the data collection period varies.

210 Of the identified 15,702 contacts, 14,002 (89%) contacts were tested for COVID-19.  
211 Apart from household contacts, most community contacts (98%) were cab-drivers,  
212 vegetable sellers, co-workers, or co-passengers in public transport. The majority of  
213 the household contacts (99%) were tested. There is no difference between tested  
214 and not-tested by age and gender (data not shown).

215 Information on age was available for 99.7% (13,969/14,002) of the contacts (Table  
216 2). The contacts were predominantly aged 21-40 years (41%) and 41 to 59 years  
217 (27%). Over half of the contacts were males (53%). About one-fourth (28%) of the  
218 contacts were traced from primary cases with congregation exposure, and 25% of

1  
2  
3 219 the contacts had household COVID-19 exposure. Healthcare providers contributed  
4  
5 220 to less than 1% of the contacts identified for the primary cases.  
6

### 7 221 ***Secondary attack rate by selected characteristics***

8  
9 222 Among tested contacts (n=14002), 599 (4.3%) tested positive for COVID-19 based  
10  
11 223 on RT PCR. The overall secondary attack rate was 4% (599 of 14,002). The  
12  
13 224 secondary attack rate was similar across the age groups and gender, ranging from  
14  
15 225 4% to 5%. The secondary attack rate among the contacts of primary cases with  
16  
17 226 congregation exposure was five times higher (10%) than contacts of non-  
18  
19 227 congregation primary cases (2%). Of the 599 contacts who tested positive, more  
20  
21 228 than three-fourths (78%) were household contacts.

22 229 The overall secondary attack rate was 4%, with 13% among the household contacts  
23  
24 230 compared to 1% among the community contacts. The secondary attack among  
25  
26 231 household contacts of primary cases with exposure to congregation was higher  
27  
28 232 (21%) than the contacts of primary cases without congregation exposure (6%) (Table  
29  
30 233 3). The primary cases' symptomatic status was available for 95% (13,338) of the  
31  
32 234 tested contacts. The overall secondary attack among contacts of the primary cases  
33  
34 235 with COVID -19 symptoms was 6% compared to 4% among the contacts of  
35  
36 236 asymptomatic cases. The household contacts exposed to the symptomatic primary  
37  
38 237 case had two times higher attack rate as compared to contacts of asymptomatic  
39  
40 238 primary cases (25% vs 12%). Secondary attack among the community contacts was  
41  
42 239 similar irrespective of the symptomatic status of the primary case.

### 43 240 ***Risk factors for secondary cases***

44 241 We estimated the risk of acquiring infection for contacts by type of contact and  
45  
46 242 congregation participation of the primary cases. There was no significant risk among  
47  
48 243 the community contacts of the primary cases irrespective of the participation in the  
49  
50 244 congregation. The relative risk of household contacts of primary cases with  
51  
52 245 congregation participation was four times higher (RR=16.4; 95% CI: 13.3 to 20.2) in  
53  
54 246 getting COVID-19 compared to household contacts of other primary cases (RR=4.9;  
55  
56 247 95% CI: 3.81 to 6.38). The association did not change even after adjusting for age  
57  
58 248 and gender. (Table 4)

59 249 We estimated the RR stratified by the symptomatic status of the primary cases. In  
60  
250 the strata where the primary case was symptomatic, there was an eight-fold increase

1  
2  
3 251 in RR for household contacts of congregation participants when compared to the  
4 252 household contacts of other cases [RR=25.3,95% CI: 10.2 to 63) vs RR= 14.6, 95%  
5 253 CI: 5.7 to 37.7)]. If the primary case was asymptomatic, there was no increase in RR  
6 254 for community contacts of congregation participants, but RR was increased among  
7 255 household contacts of primary cases with congregation exposure. The change in RR  
8 256 among household contacts of the symptomatic primary case was several folds  
9 257 higher as compared to household contacts of the asymptomatic primary case (Table  
10 258 5).

## 17 259 **Discussion:**

19 260 Our study showed an increase in disease transmission among household contacts  
20 261 than community contacts. The transmission was further accentuated if the primary  
21 262 case had symptoms or exposure to a congregation. The high risk of infection among  
22 263 family members was consistent with the pooled analysis of 43 studies which  
23 264 estimated an SAR of 18% among household contacts<sup>19</sup>. Other systematic reviews  
24 265 demonstrated a secondary attack rate of 16.6%<sup>20</sup> and 27%<sup>21</sup> compared to our study.  
25 266 This may probably due to the timeline of our study in early part of the pandemic. We  
26 267 also observed very low SAR (1%) among non-household contacts, possibly due to  
27 268 the State's lockdown situation during the study period. Contact tracing is one of the  
28 269 core public health strategies for COVID-19 control, and our study assessed if  
29 270 districts implemented this strategy. Although the median number of contacts per  
30 271 case was 17, there was a high variation between districts due to limiting the contact  
31 272 tracing to only household contacts in several cases. A study in the UK measuring the  
32 273 efficacy of contact tracing for COVID-19 suggested an average of 36 contacts must  
33 274 be traced per case<sup>22</sup>. Another study in the Republic of Korea shows a range of 15-  
34 275 649 contacts traced per case<sup>23</sup>. Once the number of cases increases, extensive  
35 276 contact tracing may not be feasible unless we deploy dedicated human resources  
36 277 and train the contact tracers. There was limited capacity in the initial phase of the  
37 278 epidemic; however, the public health department added human resources, especially  
38 279 in the capital city of Chennai, to sustain the contact tracing as cases started  
39 280 increasing.

40 281 Initially, testing was done among the individuals reported with symptoms. But due to  
41 282 the clustering of cases among the congregation attendees, all the congregation  
42 283 attendees were tested irrespective of symptom status, as there was lot of panic in



1  
2  
3 284 the initial phase of the pandemic. It posed high risk of big outbreak. Similarly, all  
4  
5 285 international travelers were tested irrespective of the symptom status. We observed  
6  
7 286 a higher attack rate among household contacts (25%) of symptomatic primary cases  
8  
9 287 when compared to asymptomatic. Our observations were similar to a pooled analysis  
10  
11 288 of three studies from Wei et al.<sup>24</sup>, Part et al.<sup>25</sup>, Chaw et al.<sup>26</sup>, which reported 20%  
12  
13 289 SAR among household contacts of symptomatic primary cases<sup>27</sup>. This observation  
14  
15 290 guided the testing policy in the context of limited resources at the peak of the  
16  
17 291 pandemic. We prioritised the testing of household contacts of symptomatic primary  
18  
19 292 cases in the subsequent phases of pandemic at times of resource constraints.  
20  
21 293 Although the attack rate was lower among contacts of asymptomatic primary, the  
22  
23 294 transmission did take place especially in the household setting. Our findings support  
24  
25 295 the rationale of isolation of all cases irrespective of the symptoms and testing of all  
26  
27 296 household contacts to break the chain of transmission<sup>28</sup>.

26 297 At the time when this investigation was undertaken, there was no widespread  
27  
28 298 community transmission. Most of the infection were among international travellers  
29  
30 299 and health care workers, and they were separated from the community, due to  
31  
32 300 isolation and quarantine protocols. Unlike international travellers, congregation  
33  
34 301 participants travelled with local people. After attending the congregation, all resumed  
35  
36 302 their routine work and social activities after arrival. This posed threat to transmit to  
37  
38 303 diseases in the community, as the congregation occurred before the lockdown.

36 304 The congregation clusters were one of the sources which led to COVID-19  
37  
38 305 transmission in various communities<sup>29</sup>. Similar to our setting, many countries  
39  
40 306 experienced clusters emerging from congregation settings. In South Korea, an  
41  
42 307 explosive outbreak happened following a social event held at a Church and is  
43  
44 308 attributable to 84% of the total confirmed cases of South Korea reported till mid-  
45  
46 309 March<sup>30</sup>. Another study in Jordan among the wedding attendees reported a higher  
47  
48 310 attack rate of 22%<sup>31</sup>. Similar clusters had been reported in different parts of South  
49  
50 311 Korea<sup>32</sup>, and in the USA, a secondary attack of 53.3% was estimated among one  
51  
52 312 such event attendees<sup>33</sup>. In addition to the effect of disease spread within the cluster,  
53  
54 313 the attendees returned from the congregation involved themselves in the routine  
55  
56 314 duties and social activities, which led to further spread of the disease in the  
57  
58 315 community. Avoiding any type of gathering is one of the essential mitigation  
59  
60 316 measures to be followed strictly. Government actions to ban mass gatherings are  
317  
318 317 essential, as are good diagnostic facilities and remotely accesses health advice,  
318  
319 318 together with specialised treatment for people with severe disease<sup>34</sup>.

1  
2  
3 319 Our study has several limitations. We did not have confirmation of the COVID-19  
4 320 status of 11% of the contacts, who were mostly community contacts. Hence, this  
5 321 may have over-estimated the overall secondary attack rate by 0.3%. Contact tracing  
6 322 was prioritised for household contacts due to restricted mobility and limited  
7 323 interactions at the community level. Therefore, secondary attack among non-  
8 324 household contacts may not reflect the real transmission potential. Information  
9 325 regarding symptoms was retrieved from district surveillance records. The symptom  
10 326 status was collected at the time of diagnosis. We could not verify if the primary case  
11 327 developed symptoms later in the course of illness. Hence, there was a chance of  
12 328 misclassification of symptom status. We abstracted the information from the records  
13 329 of the district surveillance units. The information on the date of exposure and the  
14 330 date of sample taken are not available for all the contacts. Hence we could not  
15 331 calculate the time taken for the contacts to be tested from the date of contact.

16 332 We conclude that COVID-19 transmission was higher among household contacts,  
17 333 contacts of symptomatic primary case, and contacts of primary cases exposed to the  
18 334 congregation. Based on the findings, we informed the testing policy and contact  
19 335 tracing strategy in the early stages of the COVID-19 epidemic in Tamil Nadu. We  
20 336 recommend testing all household contacts irrespective of the symptoms and  
21 337 extensive contact tracing and testing in case of super spreader events. In resource-  
22 338 constrained settings, all contacts of symptomatic primary cases should be prioritised  
23 339 for testing. The gatherings should be restricted to prevent significant clusters.

24 340

25 341 **Author Contributions:** KK, RMK, MP, and PK designed the study, supervised  
26 342 fieldwork, did primary data collection, planned data analysis and wrote the first draft  
27 343 of the manuscript. VV, PRK, MNS, PS, PG and MSK did primary data collection and  
28 344 did data analysis. MS, VV, IS, and KI supervised fieldwork and data management.  
29 345 JM, RG, SS, SR, SKST, VM, MT, JK, VG, and SK supervised fieldwork and  
30 346 supported data collection. PV, YN, SP, STS, MR, BR and MM conceptualised the  
31 347 study and gave critical comments in finalising the manuscript. All authors approved  
32 348 the final manuscript

33 349

34 350 **Funding:**

35 350

1  
2  
3 351 This work was supported by ICMR-National Institute of Chennai intramural funds.  
4

5 352 **Award/Grant number:** Not applicable  
6

7 353 **Competing interests:** None declared  
8

9 354 **Patient consent for publication:** Not required  
10

11 355 **Ethics approval:** Institutional Ethics Committee of ICMR-National Institute of  
12  
13  
14 356 Epidemiology, Chennai, approved the study. Written consent was not required for  
15  
16 357 this study

17 358 **Provenance and peer review:** Not commissioned; externally peer-reviewed.  
18

19 359 **Data availability statement:** Data are available upon reasonable request  
20  
21

22 360 **Trial registration:** Not applicable  
23  
24  
25  
26  
27  
28  
29  
30  
31  
32  
33  
34  
35  
36  
37  
38  
39  
40  
41  
42  
43  
44  
45  
46  
47  
48  
49  
50  
51  
52  
53  
54  
55  
56  
57  
58  
59  
60

1  
2  
3 361 **Figure 1:** Map of Tamil Nadu included in the epidemiological study of COVID-19  
4  
5  
6  
7  
8  
9  
10  
11  
12  
13  
14  
15  
16  
17  
18  
19  
20  
21  
22  
23  
24  
25  
26  
27  
28  
29  
30  
31  
32  
33  
34  
35  
36  
37  
38  
39  
40  
41  
42  
43  
44  
45  
46  
47  
48  
49  
50  
51  
52  
53  
54  
55  
56  
57  
58  
59  
60

For peer review only

**Table 1: Frequency of contacts traced per COVID-19 primary case by district, Tamil Nadu, India, March-May, 2020**

| District    | Days since reporting of the first case in the district | # Primary Cases | Frequency of contacts |                    |                    |                                          | No. of contacts tested | No of contacts tested positive | SAR           |
|-------------|--------------------------------------------------------|-----------------|-----------------------|--------------------|--------------------|------------------------------------------|------------------------|--------------------------------|---------------|
|             |                                                        |                 | # Contacts identified | Household contacts | Community Contacts | Median (Range) contacts per Primary case |                        |                                |               |
| Chennai     | 51                                                     | 530             | 9731                  | 1795               | 7936               | 18 (1 to 151)                            | 9724                   | 261                            | 3 (2.4-3.0)   |
| Coimbatore  | 33                                                     | 151             | 3257                  | 570                | 2687               | 22 (1 to 274)                            | 1585                   | 151                            | 10(8.2-11.1)  |
| Erode       | 46                                                     | 56              | 1032                  | 246                | 786                | 18 (3 to 141)                            | 1032                   | 38                             | 4 (2.7-5.0)   |
| Karur       | 15                                                     | 42              | 416                   | 271                | 145                | 10 (1 to 86)                             | 416                    | 18                             | 4(2.8-6.7)    |
| Ranipet     | 25                                                     | 29              | 273                   | 153                | 120                | 9 (1 to 68)                              | 273                    | 11                             | 4(2.3-7.1)    |
| Tirunelveli | 23                                                     | 35              | 166                   | 157                | 9                  | 5 (1 to 21)                              | 145                    | 20                             | 14(9.1-20.0)  |
| Tirupathur  | 20                                                     | 12              | 312                   | 61                 | 251                | 26 (1 to 100)                            | 312                    | 5                              | 2(0.7-3.7)    |
| Tiruppur    | 24                                                     | 66              | 279                   | 241                | 38                 | 5 (1 to 10)                              | 279                    | 80                             | 29(23.7-34.0) |
| Vellore     | 23                                                     | 10              | 236                   | 51                 | 185                | 24 (6 to 79)                             | 236                    | 15                             | 6(3.9-10.0)   |
| Overall     |                                                        | 931             | 15,702                | 3545               | 12157              | 17(5 to 26)                              | 14002                  | 599                            | 4(4.0-4.6)    |

**Table 2: Secondary Attack Rate (%) by selected characteristics among the contacts traced per COVID-19 primary case, Tamil Nadu, India, March- May 2020**

| Selected characteristics                         | Number of contacts (%) | # COVID-19 Positive | Secondary attack rate % (95% CI) |
|--------------------------------------------------|------------------------|---------------------|----------------------------------|
| <b>Overall</b>                                   | <b>14002(100%)</b>     | <b>599</b>          | <b>4 (4.0-4.6)</b>               |
| Age in Years (N=13,379)                          | ≤20                    | 3203 (24%)          | 4 (3.7-5.1)                      |
|                                                  | 21-40                  | 5511 (41%)          | 4(3.8-4.9)                       |
|                                                  | 41-59                  | 3364 (25%)          | 5(4.0-5.4)                       |
|                                                  | 60+                    | 1301 (10%)          | 5 (4.0-6.4)                      |
| Gender (N=13,969)                                | Male                   | 7443 (53%)          | 4 (3.4-4.2)                      |
|                                                  | Female                 | 6526 (47%)          | 5 (4.4-5.4)                      |
| Congregation exposure of primary case (N=14,002) | Yes                    | 3884 (28%)          | 10 (8.8-10.7)                    |
|                                                  | No                     | 10,118 (72%)        | 2 (1.9-2.5)                      |
| Contact type (N=14,002)                          | Household              | 3474 (25%)          | 13 (12.3-14.5)                   |
|                                                  | Community              | 10,417 (74%)        | 1 (1.0 – 1.5)                    |
|                                                  | Healthcare personnel   | 111 (1%)            | 0                                |
| Symptom status of Primary case (N=13338)         | Symptomatic            | 607(5%)             | 6 (4.5-8.3)                      |
|                                                  | Asymptomatic           | 12,731(95%)         | 4 (3.3-4.0)                      |

**Table 3: Secondary Attack Rate among household and non-household contacts of COVID-19 individuals by type of exposure and symptom status of primary cases, Tamil Nadu, March-May, 2020 (N=14002)**

| Type of exposure or symptom status of the primary case | The secondary attack rate (%) (95% CI)<br>(# cases / # contacts of the case) |                    |                      |
|--------------------------------------------------------|------------------------------------------------------------------------------|--------------------|----------------------|
|                                                        | Household                                                                    | Community contacts | Overall              |
| <b>N = 14,002</b>                                      | <b>21 (19.0 – 22.9)</b>                                                      | <b>1 (0.6-1.5)</b> | <b>10 (8.8-10.7)</b> |
| Congregation                                           | (352/1686)                                                                   | (25/2198)          | (377/3884)           |
| No congregation                                        | <b>6 (5.2-7.5)</b>                                                           | <b>1 (1.0-1.6)</b> | <b>2 (1.9-2.5)</b>   |
|                                                        | (112/1788)                                                                   | (110/8330)         | (222/10118)          |
| <b>N= 13,338</b>                                       | <b>25 (17.6-34.1)</b>                                                        | <b>2 (1.2-3.9)</b> | <b>6 (4.5-8.3)</b>   |
| Symptomatic                                            | (26/104)                                                                     | (11/503)           | (37/607)             |
| Asymptomatic                                           | <b>12 (10.5-12.9)</b>                                                        | <b>1 (1.0-1.5)</b> | <b>4 (3.3-4)</b>     |
|                                                        | (341/2930)                                                                   | (123/9801)         | (464/12731)          |

**Table 4: Factors associated with COVID-19 among the contacts of Tamil Nadu, India March – May 2020**

| Risk factors                                            | Crude RR<br>(95% CI) | RR with age-adjusted<br>(95% CI) | RR with age and sex-<br>adjusted<br>(95% CI) |
|---------------------------------------------------------|----------------------|----------------------------------|----------------------------------------------|
| Community contacts of non-congregation<br>Primary cases | Ref                  | Ref                              | Ref                                          |
| Community contact of Congregation Primary<br>cases      | 1.0 (0.7-1.5)        | 0.9 (0.6-1.4)                    | 0.9 (0.6-1.4)                                |
| Household contacts of non-congregation<br>Primary cases | 4.9 (3.8-6.4)        | 4.7 (3.7 – 6.2)                  | 4.7 (36.4-6.1)                               |
| Household contacts of Congregation Primary<br>cases     | 16.4 (13.3–20.2)     | 16.2 (13.1-20.0)                 | 16.1 (13.0-20.0)                             |



**Table 5: Factors associated with COVID-19 among the contacts stratified by the symptomatic status of the primary cases of Tamil Nadu, India March – May 2020**

| Symptomatic Primary | Type of contacts                                     | Crude RR (95% CI)   | Adjusted RR with Age and Sex (95% CI) |
|---------------------|------------------------------------------------------|---------------------|---------------------------------------|
| Yes                 | Community contacts of non-congregation Primary cases |                     | Ref                                   |
|                     | Community contact of Congregation Primary cases      | 10.5 (6.0-33.0)     | 8.6 (2.6 – 29.1)                      |
|                     | Household contacts of non-congregation Primary cases | 15.5 (6.0-39.8)     | 14.6 (5.7 – 37.7)                     |
|                     | Household contacts of Congregation Primary cases     | 26.7 (10.8-65.9)    | 25.3 (10.2 – 63.0)                    |
| No                  | Community contacts of non-congregation Primary cases |                     | Ref                                   |
|                     | Community contact of Congregation Primary cases      | 0.9 (0.6-1.4)       | 0.9 (0.5 – 1.3)                       |
|                     | Household contacts of non-congregation Primary cases | 4.6 (3.5-6.0)       | 4.4 (3.4 – 5.8)                       |
|                     | Household contacts of Congregation Primary cases     | 16.48 (13.17-20.63) | 16.52 (13.16 – 20.74)                 |

## Reference:

- 
- 1 World Health Organization. Statement on the second meeting of the International Health Regulations (2005) Emergency Committee regarding the outbreak of novel coronavirus (2019-nCoV). [https://www.who.int/news-room/detail/30-01-2020-statement-on-the-second-meeting-of-the-international-health-regulations-\(2005\)-emergency-committee-regarding-the-outbreak-of-novel-coronavirus-\(2019-ncov\)](https://www.who.int/news-room/detail/30-01-2020-statement-on-the-second-meeting-of-the-international-health-regulations-(2005)-emergency-committee-regarding-the-outbreak-of-novel-coronavirus-(2019-ncov)) (2020).
- 2 WHO; Coronavirus disease (COVID-19): Contact tracing 2020 [Available from: <https://www.who.int/news-room/q-a-detail/coronavirus-disease-covid-19-contact-tracing>.
- 3 Halloran ME. Secondary Attack Rate. In: Peter A, Theodore C, editors. Encyclopedia of Biostatistics. New York: John Wiley & Sons Ltd; 2005
- 4 Li W, Zhang B, Lu J, Liu S, Chang Z, Cao P, et al. The characteristics of household transmission of COVID-19. *Clinical Infectious Diseases*. 2020.
- 5 Liu Y, Eggo RM, Kucharski AJ. Secondary attack rate and superspreading events for SARS-CoV-2. *The Lancet*. 2020 Mar 14;395(10227):e47
- 6 Luo L, Liu D, Liao X, Wu X, Jing Q, Zheng J, Liu F, Yang S, Bi H, Li Z, Liu J. Contact settings and risk for transmission in 3410 close contacts of patients with COVID-19 in Guangzhou, China: a prospective cohort study. *Annals of internal medicine*. 2020 Aug 13
- 7 Yang J, Zheng Y, Gou X, Pu K, Chen Z, Guo Q, et al. Prevalence of comorbidities and its effects in patients infected with SARS-CoV-2: a systematic review and meta-analysis. *International Journal of Infectious Diseases*. 2020; 94:91-5
- 8 Cheng HY, Jian SW, Liu DP, Ng TC, Huang WT, Lin HH. High transmissibility of COVID-19 near symptom onset. *medRxiv*. 2020 Jan 1
- 9 Wilder-Smith A, Chiew CJ, Lee VJ. Can we contain the COVID-19 outbreak with the same measures as for SARS?. *The Lancet Infectious Diseases*. 2020 Mar 5
- 10 Jahan N, Rubeshkumar P, Karuppiyah M, Sambath I, Sendhilkumar M, Ilangovan K, et al. Entry and initial spread of COVID-19 in India: Epidemiological analysis of media surveillance data, India, 2020. *Clinical Epidemiology and Global Health*. 2020.
- 11 MediaBulletin180320COVID19.pdf [Internet]. [cited 2020 May 31]. Available from: <https://stopcorona.tn.gov.in/wp-content/uploads/files/MediaBulletin180320COVID19.pdf>
- 12 Ali, A. (2020, April 1). Coronavirus was a test of secular nationalism. Then Tablighi Jamaat became the scapegoat. *The Print*. <https://theprint.in/opinion/coronavirus-test-of-secular-nationalism-tablighi-jamaat-became-scapegoat/392764/>
- 13 Gathering at Nizamuddin a highly irresponsible act, says Kejriwal. (2020, March 31). *The Hindu*. <https://www.thehindu.com/news/cities/Delhi/gathering-at-nizamuddin-a-highly-irresponsible-act-says-kejriwal/article31221982.ece>
- 14 Chandna, H. (2020, April 18). 30% of India's Covid-19 positive caseload linked to Tablighi Jamaat meet, says govt. *The Print*. <https://theprint.in/health/30-of-indias-covid-19-positive-caseload-linked-to-tablighi-jamaat-meet-says-govt/404426/>

- 1  
2  
3  
4  
5  
6  
7  
8  
9  
10  
11  
12  
13  
14  
15  
16  
17  
18  
19  
20  
21  
22  
23  
24  
25  
26  
27  
28  
29  
30  
31  
32  
33  
34  
35  
36  
37  
38  
39  
40  
41  
42  
43  
44  
45  
46  
47  
48  
49  
50  
51  
52  
53  
54  
55  
56  
57  
58  
59  
60
- 
- <sup>15</sup> Of 14,378 total Covid-19 cases in India, 4,291 linked to Delhi's Markaz event: Health ministry. (2020, April 18). *India Today*. <https://www.indiatoday.in/india/story/coronavirus-india-total-cases-linked-tablighi-jamaat-markaz-nizamuddin-event-health-ministry-1668456-2020-04-18>
- <sup>16</sup> NDTV. 1,023 COVID-19 Cases Linked To Mosque Event, Tamil Nadu Leads: 10 Points: NDTV; [Available from: <https://www.ndtv.com/india-news/coronavirus-tablighi-jamaat-1-023-of-2-902-covid-19-cases-linked-to-mosque-event-tamil-nadu-leads-2206193>
- <sup>17</sup> National Centre for Disease Control Directorate General of Health Services MoH&FW, GOI, New Delhi The updated case definitions and contact-categorisation [internet]. [cited 2020 Jun 2]. Available from [https://nirth.res.in/virology/Revised\\_case\\_definitions\\_for\\_COVID\\_19.pdf](https://nirth.res.in/virology/Revised_case_definitions_for_COVID_19.pdf)
- <sup>18</sup> Guidelines for investigating clusters of health events. *MMWR Recomm Rep*. 1990 Jul 27;39(RR-11):1-23. PMID: 2117247. .
- <sup>19</sup> Koh WC, Naing L, Chaw L, Rosledzana MA, Alikhan MF, et al. (2020) What do we know about SARS-CoV-2 transmission? A systematic review and meta-analysis of the secondary attack rate and associated risk factors. *PLOS ONE* 15(10): e0240205. <https://doi.org/10.1371/journal.pone.0240205>
- <sup>20</sup> Madewell ZJ, Yang Y, Longini IM Jr, Halloran ME, Dean NE. Household Transmission of SARS-CoV-2: A Systematic Review and Meta-analysis. *JAMA Netw Open*. 2020 Dec 1;3(12):e2031756. doi: 10.1001/jamanetworkopen.2020.31756. PMID: 33315116; PMCID: PMC7737089.
- <sup>21</sup> Lei H, Xu X, Xiao S, Wu X, Shu Y. Household transmission of COVID-19-a systematic review and meta-analysis. *J Infect*. 2020;81(6):979-997. doi:10.1016/j.jinf.2020.08.033
- <sup>22</sup> Keeling MJ, Hollingsworth TD, Read JM. The Efficacy of Contact Tracing for the Containment of the 2019 Novel Coronavirus (COVID-19). *medRxiv*. 2020.
- <sup>23</sup> COVID-19 National Emergency Response Center Epidemiology and case management team, Korea Centers for disease Control and prevention. Coronavirus disease-19: summary of 2,370 contact investigations of the first 30 cases in the Republic of Korea. *Public Health Res Perspect*. 2020;11(2):81–84. doi: 10.24171/j.phrp.2020.11.2.04
- <sup>24</sup> Wei L, Lv Q, Wen Y, Feng S, Gao W, Chen Z, Cao B, Wu X, Lu Y, Zhao J, Zou X. Household transmission of COVID-19, Shenzhen, January-February 2020. *medRxiv*. 2020 Jan 1
- <sup>25</sup> Park SY, Kim YM, Yi S, Lee S, Na BJ, Kim CB, Kim JI, Kim HS, Kim YB, Park Y, Huh IS. Coronavirus disease outbreak in call center, South Korea. *Emerging infectious diseases*. 2020 Aug;26(8):1666.
- <sup>26</sup> Chaw, L., Koh, W., Jamaludin, S., Naing, L., Alikhan, M., & Wong, J. (2020). Analysis of SARS-CoV-2 Transmission in Different Settings, Brunei. *Emerging Infectious Diseases*, 26(11), 2598-2606. <https://dx.doi.org/10.3201/eid2611.202263>
- <sup>27</sup> Koh WC, Naing L, Chaw L, Rosledzana MA, Alikhan MF, et al. (2020) What do we know about SARS-CoV-2 transmission? A systematic review and meta-analysis of the secondary attack rate and associated risk factors. *PLOS ONE* 15(10): e0240205. <https://doi.org/10.1371/journal.pone.0240205>

- 
- 1  
2  
3  
4 28 MOHFW. Revised guidelines for Home Isolation of very mild/pre-  
5 symptomatic/asymptomatic COVID-19 cases. MOHFW 2020 July 2 [Available from  
6 [RevisedHomeIsolationGuidelines.pdf \(mohfw.gov.in\)](#)  
7  
8 29 Quadri SA. COVID-19 and religious congregations: Implications for spread of novel  
9 pathogens. *International Journal of Infectious Diseases*. 2020 Jul 1;96:219-21.  
10  
11 30 Choi JY. COVID-19 in South Korea. *Postgraduate Medical Journal*. 2020;96(1137):399-  
12 402.  
13  
14 31 Yusef D, Hayajneh W, Awad S, Momany S, Khassawneh B, Samrah S, Obeidat B, Raffee  
15 L, Al-Faouri I, Issa AB, Al Zamel H. Large outbreak of coronavirus disease among wedding  
16 attendees, Jordan. *Emerging infectious diseases*. 2020 Sep;26(9):2165.  
17  
18 32 Shim E, Tariq A, Choi W, Lee Y, Chowell G. Transmission potential and severity of  
19 COVID-19 in South Korea. *International Journal of Infectious Diseases*. 2020;93:339-44.  
20  
21 33 Hamner L, Dubbel P, Capron I, Ross A, Jordan A, Lee J, et al. High SARS-CoV-2 Attack  
22 Rate Following Exposure at a Choir Practice - Skagit County, Washington, March 2020.  
23 *MMWR Morbidity and mortality weekly report*. 2020;69(19):606-10  
24  
25 34 The Times of India; Avoid mass gatherings, says govt as corona cases hit 31: [Available  
26 from:  
27 [http://timesofindia.indiatimes.com/articleshow/74520610.cms?utm\\_source=contentofinterest](http://timesofindia.indiatimes.com/articleshow/74520610.cms?utm_source=contentofinterest&utm_medium=text&utm_campaign=cppst)  
28 [&utm\\_medium=text&utm\\_campaign=cppst](http://timesofindia.indiatimes.com/articleshow/74520610.cms?utm_source=contentofinterest&utm_medium=text&utm_campaign=cppst)  
29  
30  
31  
32  
33  
34  
35  
36  
37  
38  
39  
40  
41  
42  
43  
44  
45  
46  
47  
48  
49  
50  
51  
52  
53  
54  
55  
56  
57  
58  
59  
60

1  
2  
3  
4  
5  
6  
7  
8  
9  
10  
11  
12  
13  
14  
15  
16  
17  
18  
19  
20  
21  
22  
23  
24  
25  
26  
27  
28  
29  
30  
31  
32  
33  
34  
35  
36  
37  
38  
39  
40  
41  
42  
43  
44  
45  
46  
47  
48  
49  
50  
51  
52  
53  
54  
55  
56  
57  
58  
59  
60

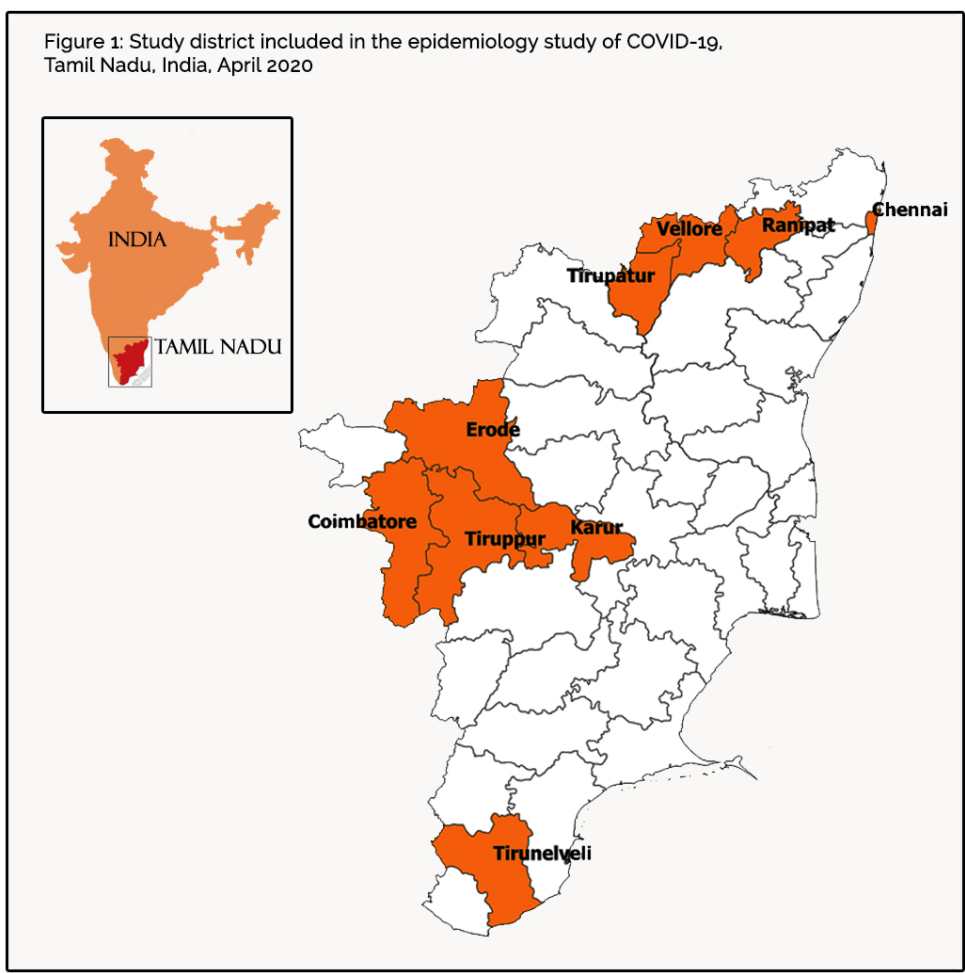

Map of Tamil Nadu included in the epidemiological study of COVID-19. There are nine of the 38 districts included in the study.

90x90mm (300 x 300 DPI)

# Reporting checklist for cohort study.

Based on the STROBE cohort guidelines.

## Instructions to authors

Complete this checklist by entering the page numbers from your manuscript where readers will find each of the items listed below.

Your article may not currently address all the items on the checklist. Please modify your text to include the missing information. If you are certain that an item does not apply, please write "n/a" and provide a short explanation.

Upload your completed checklist as an extra file when you submit to a journal.

In your methods section, say that you used the STROBE cohort reporting guidelines, and cite them as:

von Elm E, Altman DG, Egger M, Pocock SJ, Gøtzsche PC, Vandenbroucke JP. The Strengthening of Reporting of Observational Studies in Epidemiology (STROBE) Statement: guidelines for reporting observational studies.

|                           |                                                                                                        | Page   |
|---------------------------|--------------------------------------------------------------------------------------------------------|--------|
|                           | Reporting Item                                                                                         | Number |
| <b>Title and abstract</b> |                                                                                                        |        |
| Title                     | <a href="#">#1a</a> Indicate the study's design with a commonly used term in the title or the abstract | 1      |

|    |                      |                     |                                                               |     |
|----|----------------------|---------------------|---------------------------------------------------------------|-----|
| 1  | Abstract             | <a href="#">#1b</a> | Provide in the abstract an informative and balanced           | 2   |
| 2  |                      |                     |                                                               |     |
| 3  |                      |                     | summary of what was done and what was found                   |     |
| 4  |                      |                     |                                                               |     |
| 5  |                      |                     |                                                               |     |
| 6  | <b>Introduction</b>  |                     |                                                               |     |
| 7  |                      |                     |                                                               |     |
| 8  |                      |                     |                                                               |     |
| 9  | Background /         | <a href="#">#2</a>  | Explain the scientific background and rationale for the       | 3   |
| 10 |                      |                     |                                                               |     |
| 11 | rationale            |                     | investigation being reported                                  |     |
| 12 |                      |                     |                                                               |     |
| 13 |                      |                     |                                                               |     |
| 14 |                      |                     |                                                               |     |
| 15 | Objectives           | <a href="#">#3</a>  | State specific objectives, including any prespecified         | 4   |
| 16 |                      |                     |                                                               |     |
| 17 |                      |                     | hypotheses                                                    |     |
| 18 |                      |                     |                                                               |     |
| 19 |                      |                     |                                                               |     |
| 20 | <b>Methods</b>       |                     |                                                               |     |
| 21 |                      |                     |                                                               |     |
| 22 |                      |                     |                                                               |     |
| 23 | Study design         | <a href="#">#4</a>  | Present key elements of study design early in the paper       | 4   |
| 24 |                      |                     |                                                               |     |
| 25 |                      |                     |                                                               |     |
| 26 | Setting              | <a href="#">#5</a>  | Describe the setting, locations, and relevant dates,          | 4   |
| 27 |                      |                     |                                                               |     |
| 28 |                      |                     | including periods of recruitment, exposure, follow-up, and    |     |
| 29 |                      |                     |                                                               |     |
| 30 |                      |                     | data collection                                               |     |
| 31 |                      |                     |                                                               |     |
| 32 |                      |                     |                                                               |     |
| 33 |                      |                     |                                                               |     |
| 34 | Eligibility criteria | <a href="#">#6a</a> | Give the eligibility criteria, and the sources and methods of | 5   |
| 35 |                      |                     |                                                               |     |
| 36 |                      |                     | selection of participants. Describe methods of follow-up.     |     |
| 37 |                      |                     |                                                               |     |
| 38 |                      |                     |                                                               |     |
| 39 | Eligibility criteria | <a href="#">#6b</a> | For matched studies, give matching criteria and number of     | n/a |
| 40 |                      |                     |                                                               |     |
| 41 |                      |                     | exposed and unexposed                                         |     |
| 42 |                      |                     |                                                               |     |
| 43 |                      |                     |                                                               |     |
| 44 |                      |                     |                                                               |     |
| 45 | Variables            | <a href="#">#7</a>  | Clearly define all outcomes, exposures, predictors,           | 5   |
| 46 |                      |                     |                                                               |     |
| 47 |                      |                     | potential confounders, and effect modifiers. Give             |     |
| 48 |                      |                     |                                                               |     |
| 49 |                      |                     | diagnostic criteria, if applicable                            |     |
| 50 |                      |                     |                                                               |     |
| 51 |                      |                     |                                                               |     |
| 52 |                      |                     |                                                               |     |
| 53 | Data sources /       | <a href="#">#8</a>  | For each variable of interest give sources of data and        | 5   |
| 54 |                      |                     |                                                               |     |
| 55 | measurement          |                     | details of methods of assessment (measurement).               |     |
| 56 |                      |                     |                                                               |     |
| 57 |                      |                     | Describe comparability of assessment methods if there is      |     |
| 58 |                      |                     |                                                               |     |
| 59 |                      |                     |                                                               |     |
| 60 |                      |                     |                                                               |     |

more than one group. Give information separately for for exposed and unexposed groups if applicable.

|                        |                      |                                                                                                                                                                               |     |
|------------------------|----------------------|-------------------------------------------------------------------------------------------------------------------------------------------------------------------------------|-----|
| Bias                   | <a href="#">#9</a>   | Describe any efforts to address potential sources of bias                                                                                                                     | n/a |
| Study size             | <a href="#">#10</a>  | Explain how the study size was arrived at                                                                                                                                     | 4   |
| Quantitative variables | <a href="#">#11</a>  | Explain how quantitative variables were handled in the analyses. If applicable, describe which groupings were chosen, and why                                                 | 5   |
| Statistical methods    | <a href="#">#12a</a> | Describe all statistical methods, including those used to control for confounding                                                                                             | 5   |
| Statistical methods    | <a href="#">#12b</a> | Describe any methods used to examine subgroups and interactions                                                                                                               | n/a |
| Statistical methods    | <a href="#">#12c</a> | Explain how missing data were addressed                                                                                                                                       | n/a |
| Statistical methods    | <a href="#">#12d</a> | If applicable, explain how loss to follow-up was addressed                                                                                                                    | n/a |
| Statistical methods    | <a href="#">#12e</a> | Describe any sensitivity analyses                                                                                                                                             | n/a |
| <b>Results</b>         |                      |                                                                                                                                                                               |     |
| Participants           | <a href="#">#13a</a> | Report numbers of individuals at each stage of study—eg numbers potentially eligible, examined for eligibility, confirmed eligible, included in the study, completing follow- | 5   |



up, and analysed. Give information separately for for  
exposed and unexposed groups if applicable.

|                  |                      |                                                                                                                                                                                                                   |     |
|------------------|----------------------|-------------------------------------------------------------------------------------------------------------------------------------------------------------------------------------------------------------------|-----|
| Participants     | <a href="#">#13b</a> | Give reasons for non-participation at each stage                                                                                                                                                                  | n/a |
| Participants     | <a href="#">#13c</a> | Consider use of a flow diagram                                                                                                                                                                                    | n/a |
| Descriptive data | <a href="#">#14a</a> | Give characteristics of study participants (eg demographic, clinical, social) and information on exposures and potential confounders. Give information separately for exposed and unexposed groups if applicable. | 5   |
| Descriptive data | <a href="#">#14b</a> | Indicate number of participants with missing data for each variable of interest                                                                                                                                   | 5   |
| Descriptive data | <a href="#">#14c</a> | Summarise follow-up time (eg, average and total amount)                                                                                                                                                           | n/a |
| Outcome data     | <a href="#">#15</a>  | Report numbers of outcome events or summary measures over time. Give information separately for exposed and unexposed groups if applicable.                                                                       | 6   |
| Main results     | <a href="#">#16a</a> | Give unadjusted estimates and, if applicable, confounder-adjusted estimates and their precision (eg, 95% confidence interval). Make clear which confounders were adjusted for and why they were included          | 6   |
| Main results     | <a href="#">#16b</a> | Report category boundaries when continuous variables were categorized                                                                                                                                             | n/a |
| Main results     | <a href="#">#16c</a> | If relevant, consider translating estimates of relative risk into absolute risk for a meaningful time period                                                                                                      | n/a |

|    |                          |                     |                                                                 |     |
|----|--------------------------|---------------------|-----------------------------------------------------------------|-----|
| 1  | Other analyses           | <a href="#">#17</a> | Report other analyses done—eg analyses of subgroups             | 6   |
| 2  |                          |                     | and interactions, and sensitivity analyses                      |     |
| 3  |                          |                     |                                                                 |     |
| 4  |                          |                     |                                                                 |     |
| 5  |                          |                     |                                                                 |     |
| 6  | <b>Discussion</b>        |                     |                                                                 |     |
| 7  |                          |                     |                                                                 |     |
| 8  |                          |                     |                                                                 |     |
| 9  |                          |                     |                                                                 |     |
| 10 | Key results              | <a href="#">#18</a> | Summarise key results with reference to study objectives        | 7   |
| 11 |                          |                     |                                                                 |     |
| 12 |                          |                     |                                                                 |     |
| 13 | Limitations              | <a href="#">#19</a> | Discuss limitations of the study, taking into account           | 8   |
| 14 |                          |                     | sources of potential bias or imprecision. Discuss both          |     |
| 15 |                          |                     | direction and magnitude of any potential bias.                  |     |
| 16 |                          |                     |                                                                 |     |
| 17 |                          |                     |                                                                 |     |
| 18 |                          |                     |                                                                 |     |
| 19 |                          |                     |                                                                 |     |
| 20 | Interpretation           | <a href="#">#20</a> | Give a cautious overall interpretation considering              | 8   |
| 21 |                          |                     | objectives, limitations, multiplicity of analyses, results from |     |
| 22 |                          |                     | similar studies, and other relevant evidence.                   |     |
| 23 |                          |                     |                                                                 |     |
| 24 |                          |                     |                                                                 |     |
| 25 |                          |                     |                                                                 |     |
| 26 |                          |                     |                                                                 |     |
| 27 |                          |                     |                                                                 |     |
| 28 | Generalisability         | <a href="#">#21</a> | Discuss the generalisability (external validity) of the study   | n/a |
| 29 |                          |                     | results                                                         |     |
| 30 |                          |                     |                                                                 |     |
| 31 |                          |                     |                                                                 |     |
| 32 |                          |                     |                                                                 |     |
| 33 | <b>Other Information</b> |                     |                                                                 |     |
| 34 |                          |                     |                                                                 |     |
| 35 |                          |                     |                                                                 |     |
| 36 | Funding                  | <a href="#">#22</a> | Give the source of funding and the role of the funders for      | 10  |
| 37 |                          |                     | the present study and, if applicable, for the original study    |     |
| 38 |                          |                     | on which the present article is based                           |     |
| 39 |                          |                     |                                                                 |     |
| 40 |                          |                     |                                                                 |     |
| 41 |                          |                     |                                                                 |     |
| 42 |                          |                     |                                                                 |     |
| 43 |                          |                     |                                                                 |     |

44 None The STROBE checklist is distributed under the terms of the Creative Commons Attribution  
 45 License CC-BY. This checklist can be completed online using <https://www.goodreports.org/>, a tool  
 46 made by the [EQUATOR Network](#) in collaboration with [Penelope.ai](#)  
 47  
 48  
 49  
 50  
 51  
 52  
 53  
 54  
 55  
 56  
 57  
 58  
 59
